# Supplementary material for: Transcriptome changes induced by abiotic stresses in Artemisia annua
Source: PubMed Central journal article supplement (PMC5821844; doi:10.1038/s41598-018-21598-1), 2018-02-21
Supplement: 41598_2018_21598_MOESM1_ESM.pdf [file 41598_2018_21598_MOESM1_ESM.pdf]

# **Transcriptome changes induced by abiotic stresses in *Artemisia annua***

## **SUPPLEMENTARY FILE 1**

Divya Vashisth<sup>1</sup>, Ritesh Kumar<sup>1</sup>, Shubhra Rastogi<sup>2</sup>, Vikas Kumar Patel<sup>3</sup>, Alok Kalra<sup>3</sup>, Madan Mohan Gupta<sup>4</sup>, Anil Kumar Gupta<sup>5</sup>, Ajit Kumar Shasany<sup>1\*</sup>

<sup>1</sup> Biotechnology Division, CSIR-Central Institute of Medicinal and Aromatic Plants, P.O. CIMAP, Lucknow- 226015, U.P., India

<sup>2</sup> Department of Biochemistry, University of Lucknow, Lucknow 226007, U. P., India

<sup>3</sup> Microbial Technology Division, CSIR-Central Institute of Medicinal and Aromatic Plants, P.O. CIMAP, Lucknow- 226015, U. P., India.

<sup>4</sup> Analytical Chemistry Division, CSIR-Central Institute of Medicinal and Aromatic Plants, P.O. CIMAP, Lucknow- 226015, U.P, India.

<sup>5</sup> Genetics and Plant Breeding Division, CSIR-Central Institute of Medicinal and Aromatic Plants, P.O. CIMAP, Lucknow- 226015, U.P., India.

**\*Correspondence:**

Ajit Kumar Shasany,  
Biotechnology Division,  
CSIR-Central Institute of Medicinal and Aromatic Plants,  
P.O. CIMAP, Lucknow-226015, U.P., India  
Phone: 91-522-2718548  
Fax: 91-522-2342666  
Email: ak.shasany@cimap.res.in, akshasany@yahoo.com

**Table S1. Raw data Processing and QC**

| <b>Samples</b> | <b>Platform</b>  | <b>Type of reads</b>       | <b>Total number of Raw Reads</b> | <b>Total number of Processed Reads</b> |
|----------------|------------------|----------------------------|----------------------------------|----------------------------------------|
| <b>CO</b>      | Illumina NextSeq | 2 x Paired end (151bp max) | 32931686                         | 30250682                               |
| <b>SA</b>      | Illumina NextSeq | 2 x Paired end (151bp max) | 45836540                         | 43173270                               |
| <b>CD</b>      | Illumina NextSeq | 2 x Paired end (151bp max) | 64825268                         | 60142686                               |
| <b>SD</b>      | Illumina NextSeq | 2 x Paired end (151bp max) | 65407218                         | 61451072                               |
| <b>SW</b>      | Illumina NextSeq | 2 x Paired end (151bp max) | 73341744                         | 69453942                               |

**Table S2. Transcriptome Denovo Assembly Statistics**

| <b>Sample Name</b>                  | <b>CO</b> | <b>SA</b> | <b>CD</b> | <b>SD</b> | <b>SW</b> |
|-------------------------------------|-----------|-----------|-----------|-----------|-----------|
| Tools used                          | Trinity   |           |           |           |           |
| Hash length                         | 25        |           |           |           |           |
| Transcripts Generated               | 89362     | 81328     | 76337     | 90470     | 96493     |
| Maximum Transcript Length           | 11127     | 15640     | 13687     | 15548     | 15587     |
| Minimum Transcript Length           | 300       | 301       | 301       | 301       | 301       |
| Average Transcript Length           | 1198.4    | 1032.6    | 1001.7    | 1008.7    | 1014.3    |
| Median Transcript Length            | 2598      | 321.5     | 1839      | 2731      | 1818      |
| Total Transcripts Length            | 107087281 | 83982122  | 76467687  | 91256868  | 97876620  |
| Total Number of Non-ATGC Characters | 0         | 0         | 0         | 0         | 0         |
| Transcripts >= 300bp                | 89362     | 81328     | 76337     | 90470     | 96493     |
| Transcripts > 500bp                 | 65888     | 53343     | 51107     | 60063     | 63822     |
| Transcripts > 1Kb                   | 42041     | 29592     | 27817     | 32123     | 34532     |
| Transcripts > 10Kb                  | 15        | 23        | 4         | 15        | 12        |
| N50 value                           | 1697      | 1491      | 1396      | 1424      | 1438      |

**Table S3. Transcriptome Annotation**

| Transcript Annotation Summary          | Transcripts |       |       |       |       |
|----------------------------------------|-------------|-------|-------|-------|-------|
|                                        | CA          | SA    | CD    | SD    | SW    |
| <b>Total Transcripts</b>               | 89362       | 81328 | 76337 | 90470 | 96493 |
| <b>Total Transcripts (COG/Cluster)</b> | 70669       | 73777 | 70546 | 82135 | 88109 |
| <b>Total Annotated Transcripts</b>     | 41618       | 38047 | 39863 | 43947 | 45091 |
| <b>Total Unannotated Transcripts</b>   | 29051       | 35730 | 30683 | 38188 | 43018 |

**Table S4. Transcript abundance of transcription factors**

|                            | CO | SA | CD | SD | SW |
|----------------------------|----|----|----|----|----|
| ABI3VP1                    | 0  | 0  | 0  | 0  | 0  |
| Alfin-like                 | 4  | 1  | 1  | 1  | 1  |
| AP2/ERF/DREB/AP2-<br>EREBP | 54 | 45 | 70 | 59 | 74 |
| ARF                        | 30 | 45 | 49 | 45 | 48 |
| ARID                       | 3  | 1  | 1  | 0  | 0  |
| AUX/IAA                    | 27 | 19 | 31 | 36 | 31 |
| B3                         | 2  | 1  | 0  | 6  | 0  |
| BBR/BPC                    | 10 | 8  | 8  | 9  | 8  |
| BES/BZR                    | 8  | 0  | 2  | 0  | 1  |
| bHLH                       | 29 | 19 | 25 | 35 | 29 |
| BSD                        | 2  | 2  | 2  | 3  | 4  |
| BZIP                       | 27 | 30 | 25 | 29 | 32 |
| C2H2                       | 13 | 13 | 13 | 16 | 15 |
| C3H                        | 24 | 30 | 21 | 34 | 26 |
| CAMTA                      | 2  | 8  | 3  | 5  | 5  |
| CCAAT                      | 3  | 5  | 3  | 4  | 6  |
| CO-like                    | 6  | 6  | 7  | 5  | 7  |
| CPP                        | 2  | 1  | 0  | 0  | 0  |
| CSD                        | 3  | 3  | 1  | 3  | 3  |
| DBB                        | 1  | 7  | 6  | 6  | 5  |
| DDT                        | 6  | 5  | 5  | 5  | 9  |
| Dof                        | 10 | 9  | 8  | 9  | 9  |
| E2F-DP                     | 3  | 3  | 2  | 1  | 1  |
| EIL                        | 2  | 2  | 3  | 2  | 2  |
| FAR1                       | 17 | 20 | 11 | 16 | 19 |
| FHA                        | 4  | 4  | 3  | 2  | 3  |
| GATA                       | 3  | 1  | 4  | 5  | 5  |
| GNAT                       | 3  | 2  | 1  | 0  | 2  |
| GRAS                       | 9  | 6  | 10 | 10 | 12 |
| GRF                        | 3  | 5  | 4  | 4  | 3  |
| HB                         | 43 | 38 | 39 | 35 | 40 |

|                             |    |    |    |    |    |
|-----------------------------|----|----|----|----|----|
| ZF-HD                       | 5  | 4  | 5  | 6  | 6  |
| HMG                         | 5  | 6  | 3  | 4  | 4  |
| HSF                         | 17 | 18 | 18 | 16 | 18 |
| Jumonji                     | 3  | 5  | 4  | 5  | 5  |
| LIM                         | 1  | 1  | 1  | 1  | 1  |
| LOB/LBD                     | 2  | 2  | 4  | 3  | 3  |
| LSD                         | 1  | 1  | 1  | 1  | 2  |
| MADS                        | 26 | 9  | 23 | 20 | 13 |
| MBF1                        | 1  | 1  | 1  | 1  | 1  |
| M-type                      | 6  | 5  | 3  | 4  | 4  |
| MYB/MYB-related             | 93 | 63 | 65 | 94 | 96 |
| NAC                         | 37 | 31 | 45 | 43 | 39 |
| NF-X1                       | 6  | 3  | 4  | 2  | 4  |
| Nin-like/NLP                | 6  | 3  | 5  | 3  | 2  |
| PHD                         | 19 | 15 | 13 | 17 | 26 |
| PLATZ                       | 1  | 1  | 1  | 1  | 3  |
| Pseudo ARR-B                | 16 | 3  | 2  | 5  | 4  |
| RAV                         | 1  | 0  | 1  | 1  | 1  |
| RWP-RK                      | 16 | 10 | 5  | 12 | 17 |
| SAP                         | 6  | 3  | 3  | 3  | 3  |
| SBP                         | 4  | 2  | 5  | 8  | 5  |
| TAZ                         | 2  | 1  | 3  | 2  | 1  |
| TCP                         | 9  | 12 | 10 | 7  | 8  |
| TRAF                        | 1  | 1  | 3  | 2  | 2  |
| Trihelix                    | 0  | 0  | 1  | 0  | 0  |
| VOZ                         | 0  | 0  | 0  | 0  | 0  |
| Whirly                      | 1  | 1  | 2  | 1  | 1  |
| WRKY                        | 63 | 76 | 85 | 81 | 95 |
| YABBY                       | 0  | 0  | 4  | 1  | 2  |
| MYC                         | 3  | 4  | 6  | 4  | 5  |
| Cycloidea-like              | 4  | 2  | 3  | 9  | 7  |
| LHY                         | 6  | 6  | 6  | 11 | 6  |
| Other transcription factors | 58 | 62 | 53 | 70 | 70 |

**Table S5. Total Transcription factors up regulated in different stress samples** (with log2fold change $\geq$ 1 and p value $\leq$ 0.05)

| <b>Transcription factor</b>                     | <b>CD</b> | <b>SA</b> | <b>SD</b> | <b>SW</b> |
|-------------------------------------------------|-----------|-----------|-----------|-----------|
| MYB and myb related                             | 4         | 3         | 4         | 1         |
| NAC                                             | 3         | 1         | 4         | 4         |
| WRKY                                            | 2         | 0         | 4         | 3         |
| YABBY transcription factor                      | 1         | 0         | 1         | 1         |
| AP2/ERF/AP2-EREBP                               | 13        | 0         | 10        | 8         |
| Auxin response factor                           | 1         | 0         | 1         | 1         |
| Dof-type zinc finger DNA-binding family protein | 1         | 0         | 1         | 2         |

|                                    |          |   |   |   |
|------------------------------------|----------|---|---|---|
| FAR1; Zinc finger, SWIM-type       | 0        | 1 | 1 | 2 |
| hb/zf-HD/HD-zip                    | 4        | 0 | 7 | 7 |
| BES1/BZR1                          | 0        | 0 | 1 | 1 |
| bHLH                               | 0        | 0 | 2 | 3 |
| bZIP                               | 0        | 0 | 1 | 0 |
| Ccaat-binding transcription factor | 0        | 1 | 2 | 0 |
| Cycloidea-like protein             | 0        | 0 | 2 | 0 |
| Cys2/His2-type zinc finger protein | 3        | 0 | 0 | 0 |
| DREB                               | 1        | 0 | 0 | 0 |
| GRAS family transcription factor   | 0        | 0 | 2 | 3 |
| GRF zinc finger protein            | 0        | 1 | 0 | 0 |
| Heat shock transcription factor    | 0        | 0 | 1 | 0 |
| heat stress transcription factor   | 0        | 0 | 1 | 2 |
| HMG                                | 0        | 0 | 1 | 0 |
| JUMONJI                            | 3        | 0 | 0 | 0 |
| Late elongated hypocotyl-like      | 0        | 0 | 2 | 5 |
| LOB domain containing protein      | 2        | 0 | 0 | 0 |
| MADS-box transcription factor      | 3        | 0 | 1 | 0 |
| squamosa promoter binding protein  | 0        | 0 | 9 | 2 |
| TCP                                | 1        | 0 | 0 | 0 |
| zinc finger CCCH protein           | 0        | 1 | 0 | 0 |
| Zinc finger protein CONSTANS-LIKE  | <u>0</u> | 1 | 0 | 1 |

**Table S6 Unigenes expressed only in stress and common in 3 or more stress.**

| <b>Unigene_ID</b>     | <b>Annotation</b>                                                                  |
|-----------------------|------------------------------------------------------------------------------------|
| Master_Control_78545  | hypothetical protein B456_003G053000 [ <i>Gossypium raimondii</i> ]                |
| Master_Control_107193 | Unknown                                                                            |
| Master_Control_107251 | Serine/Threonine kinase, plant-type protein, putative                              |
| Master_Control_173524 | Unknown                                                                            |
| Master_Control_176756 | Unknown                                                                            |
| Master_Control_121391 | Unknown                                                                            |
| Master_Control_167914 | Uncharacterized protein                                                            |
| Master_Control_170559 | Unknown                                                                            |
| Master_Control_182019 | Coffea canephora DH200=94 genomic scaffold, scaffold_8 (ribonuclease III activity) |
| Master_Control_182023 | uncharacterized protein                                                            |
| Master_Control_79960  | Putative non-LTR retroelement reverse transcriptase                                |
| Master_Control_125981 | uncharacterized protein                                                            |
| Master_Control_182017 | Coffea canephora DH200=94 genomic scaffold, scaffold_8 (ribonuclease III activity) |
| Master_Control_48802  | uncharacterized protein (zinc ion binding)                                         |
| Master_Control_54707  | Unknown                                                                            |
| Master_Control_131945 | short chain alcohol dehydrogenase, putative                                        |
| Master_Control_95060  | Glucose-1-phosphate adenylyltransferase                                            |
| Master_Control_100008 | Endoglucanase (EC 3.2.1.4)                                                         |

|                       |                                                          |
|-----------------------|----------------------------------------------------------|
| Master_Control_118858 | kelch repeat protein                                     |
| Master_Control_119991 | Unknown                                                  |
| Master_Control_122964 | Coffea canephora DH200=94 genomic scaffold, scaffold_41  |
| Master_Control_127484 | DNA binding protein, putative                            |
| Master_Control_128238 | Homocysteine S-methyltransferase 1                       |
| Master_Control_130527 | Pentatricopeptide repeat-containing protein              |
| Master_Control_131796 | Chromomethylase(DNA methyltransferase activity)          |
| Master_Control_135752 | Unknown                                                  |
| Master_Control_136107 | Uncharacterized protein with oxidoreductase activity     |
| Master_Control_137283 | Beta-amyrin synthase                                     |
| Master_Control_139769 | GRAS family transcription factor                         |
| Master_Control_143435 | Xyloglucan endotransglucosylase/hydrolase (EC 2.4.1.207) |
| Master_Control_165088 | Unknown                                                  |
| Master_Control_172275 | Uncharacterized protein with hydrolase activity          |
| Master_Control_189133 | Putative helicase                                        |
| Master_Control_35350  | Unknown                                                  |
| Master_Control_69406  | Uncharacterized protein involved in signal transduction  |
| Master_Control_69433  | Spermidine synthase 3 isoform 3                          |
| Master_Control_71485  | uncharacterized protein                                  |
| Master_Control_72796  | Unknown                                                  |
| Master_Control_78764  | Putative helicase                                        |
| Master_Control_82690  | Putative squalene monooxygenase                          |
| Master_Control_85614  | uncharacterized protein                                  |

**Table S7. Transcripts unexpressed in all the stresses.**

| <b>Unigene ID</b>    | <b>Annotation</b>                                                                |
|----------------------|----------------------------------------------------------------------------------|
| Master_Control_29067 | 40S ribosomal protein S27                                                        |
| Master_Control_18563 | ATP synthase subunit a                                                           |
| Master_Control_20652 | Beta-carotene isomerase D27 (Dwarf 27)                                           |
| Master_Control_14841 | Beta-galactosidase (EC 3.2.1.23)                                                 |
| Master_Control_8160  | Ca <sup>2+</sup> activated outward rectifying K <sup>+</sup> channel 6 isoform 1 |
| Master_Control_26067 | Cation chloride cotransporter                                                    |
| Master_Control_20232 | Component of cytosolic 80S ribosome and 40S small subunit                        |
| Master_Control_5462  | Cytochrome b                                                                     |
| Master_Control_27331 | Cytochrome c oxidase subunit 1 (EC 1.9.3.1)                                      |
| Master_Control_21339 | Cytochrome c oxidase subunit 1 (EC 1.9.3.1)                                      |
| Master_Control_8328  | Cytochrome c oxidase subunit 1 (EC 1.9.3.1) (Fragment)                           |
| Master_Control_3961  | Cytochrome c oxidase subunit 2                                                   |
| Master_Control_26758 | Cytochrome c oxidase subunit 3                                                   |
| Master_Control_23696 | Cytochrome P450-dependent monooxygenase-like protein                             |
| Master_Control_25167 | DNA binding protein-like (Os07g0190600 protein)                                  |
| Master_Control_31202 | DNA topoisomerase 6 subunit A (EC 5.99.1.3)                                      |
| Master_Control_14932 | DNase I superfamily protein, putative                                            |

|                      |                                                                                   |
|----------------------|-----------------------------------------------------------------------------------|
| Master_Control_18386 | Endonuclease/exonuclease/phosphatase family protein                               |
| Master_Control_17874 | Endonuclease/exonuclease/phosphatase family protein                               |
| Master_Control_17024 | Fiber protein Fb9 (Fragment)                                                      |
| Master_Control_25679 | Germacrene A oxidase (BsGAO)                                                      |
| Master_Control_30970 | Glyoxalase/Bleomycin resistance protein/Dioxygenase superfamily protein isoform 2 |
| Master_Control_17483 | Hemoglobin                                                                        |
| Master_Control_12113 | Histone deacetylase 2a-like                                                       |
| Master_Control_7001  | Homeobox-leucine zipper protein ROC5                                              |
| Master_Control_23700 | Leucine-rich repeat transmembrane protein kinase, putative                        |
| Master_Control_9413  | Membrane acyl-CoA binding protein                                                 |
| Master_Control_3853  | NADH-ubiquinone oxidoreductase chain 1 (EC 1.6.5.3)                               |
| Master_Control_14782 | P-loop containing nucleoside triphosphate hydrolases superfamily protein          |
| Master_Control_16603 | Predicted protein                                                                 |
| Master_Control_14551 | Protease-related family protein                                                   |
| Master_Control_7537  | Protein kinase APK1B, chloroplast, putative (EC 2.7.10.2)                         |
| Master_Control_11426 | Putative AP endonuclease/reverse transcriptase                                    |
| Master_Control_6711  | Putative homogentisate 1,2-dioxygenase (Fragment)                                 |
| Master_Control_12126 | Putative non-LTR retroelement reverse transcriptase                               |
| Master_Control_1645  | Putative PIF1 DNA helicase/replication protein A1-like protein                    |
| Master_Control_6596  | Putative polyprotein                                                              |
| Master_Control_28236 | Putative polyprotein                                                              |
| Master_Control_24989 | Putative retrotransposon                                                          |
| Master_Control_8829  | Putative reverse transcriptase                                                    |
| Master_Control_5883  | Putative reverse transcriptase (Retrotransposon protein, putative, unclassified)  |
| Master_Control_7757  | Putative senescence-associated protein (Fragment)                                 |
| Master_Control_4261  | Receptor-like kinase                                                              |
| Master_Control_19288 | Retrotransposon protein, putative, unclassified                                   |
| Master_Control_16779 | Retrotransposon, unclassified-like protein                                        |
| Master_Control_30711 | Reverse transcriptase (Fragment)                                                  |
| Master_Control_22069 | RNA-directed DNA polymerase (Reverse transcriptase)                               |
| Master_Control_5786  | RuBisCO subunit binding-protein beta subunit (Fragment)                           |
| Master_Control_26955 | Senescence-associated protein                                                     |
| Master_Control_22962 | Steroid binding protein, putative (EC 1.3.1.74)                                   |
| Master_Control_26454 | Transcription factor GbMYB1                                                       |
| Master_Control_7672  | GDP-L-galactose phosphorylase (Uncharacterized protein)                           |
| Master_Control_13850 | Protein kinase APK1A, chloroplastic (Uncharacterized protein)                     |
| Master_Control_29539 | Putative uncharacterized protein                                                  |
| Master_Control_16718 | Putative uncharacterized protein                                                  |
| Master_Control_31796 | Putative uncharacterized protein                                                  |
| Master_Control_27544 | Putative uncharacterized protein                                                  |
| Master_Control_14911 | Putative uncharacterized protein                                                  |
| Master_Control_27695 | Putative uncharacterized protein                                                  |
| Master_Control_307   | Putative uncharacterized protein                                                  |

|                      |                                              |
|----------------------|----------------------------------------------|
| Master_Control_27813 | Putative uncharacterized protein             |
| Master_Control_3395  | Putative uncharacterized protein             |
| Master_Control_25143 | Putative uncharacterized protein             |
| Master_Control_19373 | Putative uncharacterized protein             |
| Master_Control_23939 | Putative uncharacterized protein             |
| Master_Control_341   | Putative uncharacterized protein             |
| Master_Control_30538 | Putative uncharacterized protein             |
| Master_Control_25407 | Putative uncharacterized protein             |
| Master_Control_2044  | Putative uncharacterized protein             |
| Master_Control_27689 | Putative uncharacterized protein             |
| Master_Control_1030  | Putative uncharacterized protein             |
| Master_Control_21503 | Putative uncharacterized protein             |
| Master_Control_17523 | Putative uncharacterized protein             |
| Master_Control_7158  | Putative uncharacterized protein             |
| Master_Control_26078 | Putative uncharacterized protein             |
| Master_Control_30169 | Putative uncharacterized protein             |
| Master_Control_24348 | Putative uncharacterized protein             |
| Master_Control_14515 | Putative uncharacterized protein             |
| Master_Control_5488  | Putative uncharacterized protein CTOS-1      |
| Master_Control_6263  | Putative uncharacterized protein Sb04g009250 |
| Master_Control_81    | Putative uncharacterized protein T2O9.150    |
| Master_Control_29280 | Uncharacterized protein                      |
| Master_Control_6229  | Uncharacterized protein                      |
| Master_Control_27112 | Uncharacterized protein                      |
| Master_Control_4863  | Uncharacterized protein                      |
| Master_Control_30999 | Uncharacterized protein                      |
| Master_Control_22236 | Uncharacterized protein                      |
| Master_Control_32342 | Uncharacterized protein                      |
| Master_Control_10332 | Uncharacterized protein                      |
| Master_Control_19801 | Uncharacterized protein                      |
| Master_Control_25170 | Uncharacterized protein                      |
| Master_Control_23827 | Uncharacterized protein                      |
| Master_Control_20584 | Uncharacterized protein                      |
| Master_Control_11606 | Uncharacterized protein                      |
| Master_Control_3861  | Uncharacterized protein                      |
| Master_Control_11142 | Uncharacterized protein                      |
| Master_Control_1897  | Uncharacterized protein                      |
| Master_Control_9905  | Uncharacterized protein                      |
| Master_Control_1002  | Uncharacterized protein                      |
| Master_Control_11182 | Uncharacterized protein                      |
| Master_Control_3969  | Uncharacterized protein                      |
| Master_Control_1717  | Uncharacterized protein                      |
| Master_Control_5517  | Uncharacterized protein                      |
| Master_Control_2023  | Uncharacterized protein                      |
| Master_Control_7240  | Uncharacterized protein                      |



|                      |                         |
|----------------------|-------------------------|
| Master_Control_18030 | Uncharacterized protein |
| Master_Control_7362  | Uncharacterized protein |
| Master_Control_7995  | Uncharacterized protein |
| Master_Control_6461  | Uncharacterized protein |
| Master_Control_19654 | Uncharacterized protein |
| Master_Control_26802 | Uncharacterized protein |
| Master_Control_3421  | Uncharacterized protein |
| Master_Control_20462 | Uncharacterized protein |
| Master_Control_18290 | Uncharacterized protein |
| Master_Control_21970 | Uncharacterized protein |
| Master_Control_23555 | Uncharacterized protein |
| Master_Control_13055 | Uncharacterized protein |
| Master_Control_25081 | Uncharacterized protein |
| Master_Control_6295  | Uncharacterized protein |
| Master_Control_6981  | Uncharacterized protein |
| Master_Control_12076 | Uncharacterized protein |
| Master_Control_25562 | Uncharacterized protein |
| Master_Control_6056  | Uncharacterized protein |
| Master_Control_25958 | Uncharacterized protein |
| Master_Control_13796 | Uncharacterized protein |
| Master_Control_1019  | Uncharacterized protein |
| Master_Control_10388 | Uncharacterized protein |
| Master_Control_26665 | Uncharacterized protein |
| Master_Control_17270 | Uncharacterized protein |
| Master_Control_28071 | Uncharacterized protein |
| Master_Control_22801 | Uncharacterized protein |
| Master_Control_301   | Uncharacterized protein |
| Master_Control_18983 | Uncharacterized protein |
| Master_Control_31386 | Uncharacterized protein |
| Master_Control_27727 | Uncharacterized protein |
| Master_Control_24036 | Uncharacterized protein |
| Master_Control_14657 | Uncharacterized protein |
| Master_Control_17154 | Uncharacterized protein |
| Master_Control_25232 | Uncharacterized protein |
| Master_Control_11232 | Uncharacterized protein |
| Master_Control_16527 | Uncharacterized protein |
| Master_Control_26626 | Uncharacterized protein |
| Master_Control_14236 | Uncharacterized protein |
| Master_Control_20566 | Uncharacterized protein |
| Master_Control_5383  | Uncharacterized protein |
| Master_Control_20706 | Uncharacterized protein |
| Master_Control_2228  | Uncharacterized protein |
| Master_Control_26154 | Uncharacterized protein |
| Master_Control_21476 | Uncharacterized protein |
| Master_Control_13833 | Uncharacterized protein |

|                      |                                                            |
|----------------------|------------------------------------------------------------|
| Master_Control_2233  | Uncharacterized protein                                    |
| Master_Control_25115 | Uncharacterized protein                                    |
| Master_Control_27525 | Uncharacterized protein                                    |
| Master_Control_22966 | Uncharacterized protein                                    |
| Master_Control_23523 | Uncharacterized protein                                    |
| Master_Control_28829 | Uncharacterized protein                                    |
| Master_Control_3841  | Uncharacterized protein                                    |
| Master_Control_16471 | Uncharacterized protein                                    |
| Master_Control_7917  | Uncharacterized protein                                    |
| Master_Control_5729  | Uncharacterized protein                                    |
| Master_Control_2586  | Uncharacterized protein (Fragment)                         |
| Master_Control_8714  | Uncharacterized protein (Fragment)                         |
| Master_Control_5685  | Uncharacterized protein (Fragment)                         |
| Master_Control_8906  | Uncharacterized protein (Fragment)                         |
| Master_Control_20181 | Uncharacterized protein (Fragment)                         |
| Master_Control_27361 | Uncharacterized protein (Fragment)                         |
| Master_Control_45    | Uncharacterized protein (Fragment)                         |
| Master_Control_22077 | Uncharacterized protein (Fragment)                         |
| Master_Control_17414 | Uncharacterized protein (Fragment)                         |
| Master_Control_29057 | Uncharacterized protein (Fragment)                         |
| Master_Control_1305  | Coffea canephora DH200=94 genomic scaffold, scaffold_10611 |
| Master_Control_5203  | Coffea canephora DH200=94 genomic scaffold, scaffold_150   |
| Master_Control_26820 | Coffea canephora DH200=94 genomic scaffold, scaffold_16    |
| Master_Control_13540 | Coffea canephora DH200=94 genomic scaffold, scaffold_19    |
| Master_Control_21528 | Coffea canephora DH200=94 genomic scaffold, scaffold_22    |
| Master_Control_11503 | Coffea canephora DH200=94 genomic scaffold, scaffold_3     |
| Master_Control_22861 | Coffea canephora DH200=94 genomic scaffold, scaffold_38    |
| Master_Control_17055 | Coffea canephora DH200=94 genomic scaffold, scaffold_5     |
| Master_Control_4426  | Coffea canephora DH200=94 genomic scaffold, scaffold_5     |
| Master_Control_28102 | Coffea canephora DH200=94 genomic scaffold, scaffold_8     |
| Master_Control_29518 | Coffea canephora DH200=94 genomic scaffold, scaffold_9     |
| Master_Control_11203 | Coffea canephora DH200=94 genomic scaffold, scaffold_94    |
| Master_Control_14734 | Coffea canephora DH200=94 genomic scaffold, scaffold_98    |
| Master_Control_13818 | NA                                                         |
| Master_Control_18124 | NA                                                         |
| Master_Control_24892 | NA                                                         |
| Master_Control_26261 | NA                                                         |
| Master_Control_15295 | NA                                                         |
| Master_Control_15642 | NA                                                         |
| Master_Control_7822  | NA                                                         |
| Master_Control_31461 | NA                                                         |
| Master_Control_15112 | NA                                                         |
| Master_Control_30703 | NA                                                         |
| Master_Control_3628  | NA                                                         |
| Master_Control_5062  | NA                                                         |

|                      |    |
|----------------------|----|
| Master_Control_29640 | NA |
| Master_Control_17792 | NA |
| Master_Control_17352 | NA |
| Master_Control_1543  | NA |
| Master_Control_14976 | NA |
| Master_Control_8504  | NA |
| Master_Control_21104 | NA |
| Master_Control_17365 | NA |
| Master_Control_6392  | NA |
| Master_Control_18283 | NA |
| Master_Control_5226  | NA |
| Master_Control_10817 | NA |
| Master_Control_1644  | NA |
| Master_Control_9660  | NA |
| Master_Control_20504 | NA |
| Master_Control_30172 | NA |
| Master_Control_26819 | NA |
| Master_Control_18199 | NA |
| Master_Control_1214  | NA |
| Master_Control_7794  | NA |
| Master_Control_30631 | NA |
| Master_Control_24147 | NA |
| Master_Control_29203 | NA |
| Master_Control_20425 | NA |
| Master_Control_10468 | NA |
| Master_Control_11015 | NA |
| Master_Control_10734 | NA |
| Master_Control_20060 | NA |
| Master_Control_3085  | NA |
| Master_Control_122   | NA |
| Master_Control_25871 | NA |
| Master_Control_19470 | NA |
| Master_Control_8562  | NA |
| Master_Control_30    | NA |
| Master_Control_27448 | NA |
| Master_Control_7494  | NA |
| Master_Control_1051  | NA |
| Master_Control_30792 | NA |
| Master_Control_15137 | NA |
| Master_Control_14123 | NA |
| Master_Control_31681 | NA |
| Master_Control_20707 | NA |
| Master_Control_13148 | NA |
| Master_Control_11390 | NA |
| Master_Control_631   | NA |

|                      |    |
|----------------------|----|
| Master_Control_13321 | NA |
| Master_Control_5544  | NA |
| Master_Control_957   | NA |
| Master_Control_14915 | NA |
| Master_Control_26486 | NA |
| Master_Control_26263 | NA |
| Master_Control_28191 | NA |
| Master_Control_16252 | NA |
| Master_Control_2381  | NA |
| Master_Control_1349  | NA |
| Master_Control_19827 | NA |
| Master_Control_10111 | NA |
| Master_Control_7029  | NA |
| Master_Control_27032 | NA |
| Master_Control_22430 | NA |
| Master_Control_27320 | NA |
| Master_Control_21687 | NA |
| Master_Control_19174 | NA |
| Master_Control_17820 | NA |
| Master_Control_6670  | NA |
| Master_Control_4461  | NA |
| Master_Control_4982  | NA |
| Master_Control_25256 | NA |
| Master_Control_3458  | NA |
| Master_Control_8618  | NA |
| Master_Control_27445 | NA |
| Master_Control_10223 | NA |
| Master_Control_8965  | NA |
| Master_Control_24293 | NA |
| Master_Control_1418  | NA |
| Master_Control_14314 | NA |
| Master_Control_30851 | NA |
| Master_Control_32293 | NA |
| Master_Control_17502 | NA |
| Master_Control_18593 | NA |
| Master_Control_25633 | NA |
| Master_Control_19322 | NA |
| Master_Control_13870 | NA |
| Master_Control_26178 | NA |
| Master_Control_18987 | NA |
| Master_Control_9306  | NA |
| Master_Control_23397 | NA |
| Master_Control_23951 | NA |
| Master_Control_15066 | NA |
| Master_Control_18363 | NA |

|                      |    |
|----------------------|----|
| Master_Control_22360 | NA |
| Master_Control_21086 | NA |
| Master_Control_23081 | NA |
| Master_Control_25017 | NA |
| Master_Control_20399 | NA |
| Master_Control_1482  | NA |
| Master_Control_24016 | NA |
| Master_Control_25060 | NA |
| Master_Control_14066 | NA |
| Master_Control_3951  | NA |
| Master_Control_2038  | NA |
| Master_Control_31342 | NA |
| Master_Control_5857  | NA |
| Master_Control_6800  | NA |
| Master_Control_29536 | NA |
| Master_Control_7544  | NA |
| Master_Control_442   | NA |
| Master_Control_16871 | NA |
| Master_Control_24164 | NA |
| Master_Control_11427 | NA |
| Master_Control_14666 | NA |
| Master_Control_19073 | NA |
| Master_Control_19961 | NA |
| Master_Control_533   | NA |
| Master_Control_28448 | NA |
| Master_Control_10454 | NA |
| Master_Control_16829 | NA |
| Master_Control_12934 | NA |
| Master_Control_22517 | NA |
| Master_Control_6169  | NA |
| Master_Control_13133 | NA |
| Master_Control_16987 | NA |
| Master_Control_17183 | NA |
| Master_Control_4537  | NA |
| Master_Control_10437 | NA |
| Master_Control_17449 | NA |
| Master_Control_7527  | NA |
| Master_Control_12563 | NA |
| Master_Control_21467 | NA |
| Master_Control_27972 | NA |
| Master_Control_24986 | NA |
| Master_Control_32292 | NA |
| Master_Control_31043 | NA |
| Master_Control_7587  | NA |
| Master_Control_11875 | NA |

|                      |    |
|----------------------|----|
| Master_Control_19181 | NA |
| Master_Control_27383 | NA |
| Master_Control_21427 | NA |
| Master_Control_23423 | NA |
| Master_Control_20459 | NA |
| Master_Control_17399 | NA |
| Master_Control_8742  | NA |
| Master_Control_1619  | NA |
| Master_Control_28755 | NA |
| Master_Control_713   | NA |
| Master_Control_24809 | NA |
| Master_Control_3485  | NA |
| Master_Control_2477  | NA |
| Master_Control_379   | NA |
| Master_Control_30771 | NA |
| Master_Control_27645 | NA |
| Master_Control_24990 | NA |
| Master_Control_1302  | NA |
| Master_Control_28163 | NA |
| Master_Control_29005 | NA |
| Master_Control_5735  | NA |
| Master_Control_2288  | NA |
| Master_Control_21951 | NA |
| Master_Control_24636 | NA |
| Master_Control_9888  | NA |
| Master_Control_13947 | NA |
| Master_Control_11789 | NA |
| Master_Control_20544 | NA |
| Master_Control_18457 | NA |
| Master_Control_30844 | NA |
| Master_Control_30721 | NA |
| Master_Control_15855 | NA |
| Master_Control_4528  | NA |
| Master_Control_7199  | NA |
| Master_Control_21707 | NA |
| Master_Control_15935 | NA |
| Master_Control_25139 | NA |
| Master_Control_17994 | NA |
| Master_Control_7471  | NA |
| Master_Control_18820 | NA |
| Master_Control_8119  | NA |
| Master_Control_4780  | NA |
| Master_Control_27183 | NA |
| Master_Control_6052  | NA |
| Master_Control_20760 | NA |

|                      |    |
|----------------------|----|
| Master_Control_26057 | NA |
| Master_Control_12223 | NA |
| Master_Control_28940 | NA |
| Master_Control_27103 | NA |
| Master_Control_9679  | NA |
| Master_Control_8860  | NA |
| Master_Control_31827 | NA |
| Master_Control_29503 | NA |
| Master_Control_19308 | NA |
| Master_Control_3022  | NA |
| Master_Control_3747  | NA |
| Master_Control_5924  | NA |
| Master_Control_8343  | NA |
| Master_Control_15512 | NA |
| Master_Control_5897  | NA |
| Master_Control_27091 | NA |
| Master_Control_4285  | NA |
| Master_Control_14367 | NA |
| Master_Control_21847 | NA |
| Master_Control_4473  | NA |
| Master_Control_4169  | NA |
| Master_Control_5641  | NA |
| Master_Control_13307 | NA |
| Master_Control_4200  | NA |
| Master_Control_12401 | NA |
| Master_Control_26950 | NA |
| Master_Control_21860 | NA |
| Master_Control_24296 | NA |
| Master_Control_24985 | NA |
| Master_Control_12573 | NA |
| Master_Control_21642 | NA |
| Master_Control_7493  | NA |
| Master_Control_6764  | NA |
| Master_Control_27787 | NA |
| Master_Control_6770  | NA |
| Master_Control_30569 | NA |
| Master_Control_24013 | NA |
| Master_Control_10450 | NA |
| Master_Control_2037  | NA |
| Master_Control_2703  | NA |
| Master_Control_26630 | NA |
| Master_Control_11663 | NA |
| Master_Control_4716  | NA |
| Master_Control_20799 | NA |
| Master_Control_2084  | NA |

|                       |    |
|-----------------------|----|
| Master_Control_16515  | NA |
| Master_Control_15319  | NA |
| Master_Control_25529  | NA |
| Master_Control_25287  | NA |
| Master_Control_7209   | NA |
| Master_Control_1196   | NA |
| Master_Control_5312   | NA |
| Master_Control_29656  | NA |
| Master_Control_19647  | NA |
| Master_Control_28086  | NA |
| Master_Control_19240  | NA |
| Master_Control_12682  | NA |
| Master_Control_3784   | NA |
| Master_Control_26705  | NA |
| Master_Control_5958   | NA |
| Master_Control_5356   | NA |
| Master_Control_19577  | NA |
| Master_Control_5649   | NA |
| Master_Control_11997  | NA |
| Master_Control_7165   | NA |
| Master_Control_26757  | NA |
| Master_Control_27946  | NA |
| Master_Control_30335  | NA |
| Master_Control_30507  | NA |
| Master_Control_311    | NA |
| Master_Control_6742   | NA |
| Master_Control_15715  | NA |
| Master_Control_30579  | NA |
| Master_Control_27673  | NA |
| Master_Control_17765  | NA |
| Master_Control_10902  | NA |
| Master_Control_8313   | NA |
| Master_Control_13456  | NA |
| Master_Control_30061  | NA |
| Master_Control_1516   | NA |
| Master_Control_17062  | NA |
| Master_Control_10882  | NA |
| Master_Control_9758   | NA |
| Master_Control_420    | NA |
| Master_Control_30107  | NA |
| Master_Control_28005  | NA |
| Master_Control_8258   | NA |
| Master_Control_122842 | NA |
| Master_Control_3921   | NA |
| Master_Control_30383  | NA |



|                      |    |
|----------------------|----|
| Master_Control_11104 | NA |
| Master_Control_3599  | NA |
| Master_Control_22934 | NA |
| Master_Control_31101 | NA |
| Master_Control_6902  | NA |
| Master_Control_28289 | NA |
| Master_Control_29541 | NA |
| Master_Control_4400  | NA |
| Master_Control_23360 | NA |
| Master_Control_26949 | NA |
| Master_Control_264   | NA |
| Master_Control_12580 | NA |
| Master_Control_24047 | NA |
| Master_Control_21635 | NA |
| Master_Control_7108  | NA |
| Master_Control_12306 | NA |
| Master_Control_9420  | NA |
| Master_Control_3945  | NA |
| Master_Control_3455  | NA |
| Master_Control_16771 | NA |
| Master_Control_26953 | NA |
| Master_Control_26957 | NA |
| Master_Control_21192 | NA |
| Master_Control_6953  | NA |
| Master_Control_30893 | NA |
| Master_Control_1526  | NA |
| Master_Control_30108 | NA |
| Master_Control_6757  | NA |
| Master_Control_4526  | NA |
| Master_Control_22970 | NA |
| Master_Control_22506 | NA |
| Master_Control_3249  | NA |
| Master_Control_7355  | NA |
| Master_Control_5785  | NA |
| Master_Control_12108 | NA |
| Master_Control_26858 | NA |
| Master_Control_16034 | NA |
| Master_Control_5972  | NA |
| Master_Control_25127 | NA |
| Master_Control_9511  | NA |
| Master_Control_26193 | NA |
| Master_Control_9897  | NA |
| Master_Control_23864 | NA |
| Master_Control_19875 | NA |
| Master_Control_9326  | NA |

|                      |    |
|----------------------|----|
| Master_Control_24629 | NA |
| Master_Control_31844 | NA |
| Master_Control_3845  | NA |
| Master_Control_12834 | NA |
| Master_Control_25652 | NA |
| Master_Control_27607 | NA |
| Master_Control_13059 | NA |
| Master_Control_25408 | NA |
| Master_Control_20612 | NA |
| Master_Control_30231 | NA |
| Master_Control_6017  | NA |
| Master_Control_17805 | NA |
| Master_Control_16690 | NA |
| Master_Control_24327 | NA |
| Master_Control_19867 | NA |
| Master_Control_14634 | NA |
| Master_Control_10175 | NA |
| Master_Control_26416 | NA |
| Master_Control_16161 | NA |
| Master_Control_14480 | NA |
| Master_Control_31986 | NA |
| Master_Control_19949 | NA |
| Master_Control_5727  | NA |
| Master_Control_17091 | NA |
| Master_Control_237   | NA |
| Master_Control_28004 | NA |
| Master_Control_31147 | NA |
| Master_Control_11156 | NA |
| Master_Control_19781 | NA |
| Master_Control_19582 | NA |
| Master_Control_5728  | NA |
| Master_Control_15138 | NA |
| Master_Control_28209 | NA |
| Master_Control_13315 | NA |
| Master_Control_3410  | NA |
| Master_Control_28585 | NA |
| Master_Control_10291 | NA |
| Master_Control_26059 | NA |
| Master_Control_6694  | NA |
| Master_Control_32008 | NA |
| Master_Control_26495 | NA |
| Master_Control_23840 | NA |
| Master_Control_28173 | NA |
| Master_Control_6571  | NA |
| Master_Control_14453 | NA |

|                      |    |
|----------------------|----|
| Master_Control_15833 | NA |
| Master_Control_7820  | NA |
| Master_Control_4965  | NA |
| Master_Control_14147 | NA |
| Master_Control_14343 | NA |
| Master_Control_29660 | NA |
| Master_Control_1776  | NA |
| Master_Control_29000 | NA |
| Master_Control_30340 | NA |
| Master_Control_32326 | NA |
| Master_Control_24407 | NA |
| Master_Control_9097  | NA |
| Master_Control_19224 | NA |
| Master_Control_3335  | NA |
| Master_Control_15206 | NA |
| Master_Control_13799 | NA |
| Master_Control_32394 | NA |
| Master_Control_9571  | NA |
| Master_Control_18099 | NA |
| Master_Control_12012 | NA |
| Master_Control_14248 | NA |
| Master_Control_18931 | NA |
| Master_Control_23747 | NA |
| Master_Control_24064 | NA |
| Master_Control_22244 | NA |
| Master_Control_4910  | NA |
| Master_Control_27981 | NA |
| Master_Control_11786 | NA |
| Master_Control_30058 | NA |
| Master_Control_5476  | NA |
| Master_Control_4923  | NA |
| Master_Control_16454 | NA |
| Master_Control_18135 | NA |
| Master_Control_11574 | NA |
| Master_Control_10728 | NA |
| Master_Control_31911 | NA |
| Master_Control_17003 | NA |
| Master_Control_8513  | NA |
| Master_Control_23102 | NA |
| Master_Control_16387 | NA |
| Master_Control_3373  | NA |
| Master_Control_7271  | NA |
| Master_Control_10136 | NA |
| Master_Control_11715 | NA |
| Master_Control_656   | NA |

|                      |    |
|----------------------|----|
| Master_Control_13110 | NA |
| Master_Control_31338 | NA |
| Master_Control_13563 | NA |
| Master_Control_22593 | NA |
| Master_Control_28702 | NA |
| Master_Control_20488 | NA |
| Master_Control_26334 | NA |
| Master_Control_10840 | NA |
| Master_Control_1192  | NA |
| Master_Control_23574 | NA |
| Master_Control_8283  | NA |
| Master_Control_319   | NA |
| Master_Control_32236 | NA |
| Master_Control_20460 | NA |
| Master_Control_4988  | NA |
| Master_Control_2081  | NA |
| Master_Control_11930 | NA |
| Master_Control_13020 | NA |
| Master_Control_26449 | NA |
| Master_Control_31529 | NA |
| Master_Control_31799 | NA |
| Master_Control_23296 | NA |
| Master_Control_19040 | NA |
| Master_Control_14007 | NA |
| Master_Control_14406 | NA |
| Master_Control_27332 | NA |
| Master_Control_29047 | NA |
| Master_Control_14777 | NA |
| Master_Control_8428  | NA |
| Master_Control_26179 | NA |
| Master_Control_20860 | NA |
| Master_Control_2250  | NA |
| Master_Control_17026 | NA |
| Master_Control_9655  | NA |
| Master_Control_31452 | NA |
| Master_Control_1489  | NA |
| Master_Control_27843 | NA |
| Master_Control_17056 | NA |
| Master_Control_5338  | NA |
| Master_Control_26360 | NA |
| Master_Control_4154  | NA |
| Master_Control_3998  | NA |
| Master_Control_3164  | NA |
| Master_Control_27477 | NA |
| Master_Control_849   | NA |

|                      |    |
|----------------------|----|
| Master_Control_9115  | NA |
| Master_Control_11692 | NA |
| Master_Control_12896 | NA |
| Master_Control_2735  | NA |
| Master_Control_13729 | NA |
| Master_Control_19546 | NA |
| Master_Control_20872 | NA |
| Master_Control_314   | NA |
| Master_Control_12141 | NA |
| Master_Control_4371  | NA |
| Master_Control_17272 | NA |
| Master_Control_9466  | NA |
| Master_Control_10270 | NA |
| Master_Control_26488 | NA |
| Master_Control_2579  | NA |
| Master_Control_5088  | NA |
| Master_Control_5964  | NA |
| Master_Control_16731 | NA |
| Master_Control_2576  | NA |
| Master_Control_23240 | NA |
| Master_Control_31641 | NA |
| Master_Control_32212 | NA |
| Master_Control_6162  | NA |
| Master_Control_24540 | NA |
| Master_Control_384   | NA |
| Master_Control_25685 | NA |
| Master_Control_8208  | NA |
| Master_Control_13033 | NA |
| Master_Control_12938 | NA |
| Master_Control_19652 | NA |
| Master_Control_2255  | NA |
| Master_Control_17240 | NA |
| Master_Control_23347 | NA |
| Master_Control_13593 | NA |
| Master_Control_30636 | NA |
| Master_Control_4235  | NA |
| Master_Control_8529  | NA |
| Master_Control_21394 | NA |
| Master_Control_15699 | NA |
| Master_Control_746   | NA |
| Master_Control_25760 | NA |
| Master_Control_26886 | NA |
| Master_Control_14930 | NA |
| Master_Control_15992 | NA |
| Master_Control_25090 | NA |

|                      |    |
|----------------------|----|
| Master_Control_23641 | NA |
| Master_Control_19637 | NA |
| Master_Control_12596 | NA |
| Master_Control_30270 | NA |
| Master_Control_14620 | NA |
| Master_Control_8945  | NA |
| Master_Control_298   | NA |
| Master_Control_22876 | NA |
| Master_Control_785   | NA |
| Master_Control_15988 | NA |
| Master_Control_7062  | NA |
| Master_Control_22322 | NA |
| Master_Control_20604 | NA |
| Master_Control_17606 | NA |
| Master_Control_4355  | NA |
| Master_Control_13289 | NA |
| Master_Control_1748  | NA |
| Master_Control_13558 | NA |
| Master_Control_13421 | NA |
| Master_Control_19836 | NA |
| Master_Control_31955 | NA |
| Master_Control_2566  | NA |
| Master_Control_19495 | NA |
| Master_Control_14037 | NA |
| Master_Control_20357 | NA |
| Master_Control_19900 | NA |
| Master_Control_4191  | NA |
| Master_Control_27690 | NA |
| Master_Control_23821 | NA |
| Master_Control_24932 | NA |
| Master_Control_8137  | NA |
| Master_Control_28898 | NA |
| Master_Control_1698  | NA |
| Master_Control_9852  | NA |
| Master_Control_19756 | NA |
| Master_Control_18632 | NA |
| Master_Control_10947 | NA |
| Master_Control_18892 | NA |
| Master_Control_8525  | NA |
| Master_Control_19666 | NA |
| Master_Control_15529 | NA |
| Master_Control_27944 | NA |
| Master_Control_14321 | NA |
| Master_Control_5909  | NA |
| Master_Control_23363 | NA |

|                      |    |
|----------------------|----|
| Master_Control_426   | NA |
| Master_Control_29318 | NA |
| Master_Control_22061 | NA |
| Master_Control_13661 | NA |
| Master_Control_22479 | NA |
| Master_Control_7616  | NA |
| Master_Control_15454 | NA |
| Master_Control_2848  | NA |
| Master_Control_25551 | NA |
| Master_Control_16027 | NA |
| Master_Control_18151 | NA |
| Master_Control_29419 | NA |
| Master_Control_28499 | NA |
| Master_Control_5489  | NA |
| Master_Control_2532  | NA |
| Master_Control_14285 | NA |
| Master_Control_1005  | NA |
| Master_Control_27075 | NA |
| Master_Control_31203 | NA |
| Master_Control_29918 | NA |
| Master_Control_12400 | NA |
| Master_Control_7713  | NA |
| Master_Control_31521 | NA |
| Master_Control_11535 | NA |
| Master_Control_26980 | NA |
| Master_Control_30347 | NA |
| Master_Control_11811 | NA |
| Master_Control_28358 | NA |
| Master_Control_17083 | NA |
| Master_Control_15533 | NA |
| Master_Control_7671  | NA |
| Master_Control_5994  | NA |
| Master_Control_16347 | NA |
| Master_Control_8697  | NA |
| Master_Control_24041 | NA |
| Master_Control_2624  | NA |
| Master_Control_8711  | NA |
| Master_Control_21236 | NA |
| Master_Control_32440 | NA |
| Master_Control_6502  | NA |
| Master_Control_11154 | NA |
| Master_Control_25604 | NA |
| Master_Control_7546  | NA |
| Master_Control_24553 | NA |
| Master_Control_26983 | NA |

|                      |    |
|----------------------|----|
| Master_Control_9421  | NA |
| Master_Control_26329 | NA |
| Master_Control_28836 | NA |
| Master_Control_13637 | NA |
| Master_Control_3567  | NA |
| Master_Control_21874 | NA |
| Master_Control_6248  | NA |
| Master_Control_18565 | NA |
| Master_Control_16761 | NA |
| Master_Control_3059  | NA |
| Master_Control_30166 | NA |
| Master_Control_6690  | NA |
| Master_Control_14200 | NA |
| Master_Control_24842 | NA |
| Master_Control_19791 | NA |
| Master_Control_6924  | NA |
| Master_Control_23037 | NA |
| Master_Control_6036  | NA |
| Master_Control_5666  | NA |
| Master_Control_18833 | NA |
| Master_Control_22189 | NA |
| Master_Control_1569  | NA |
| Master_Control_31409 | NA |
| Master_Control_28138 | NA |
| Master_Control_13290 | NA |
| Master_Control_2707  | NA |
| Master_Control_14897 | NA |
| Master_Control_2486  | NA |
| Master_Control_262   | NA |
| Master_Control_11632 | NA |
| Master_Control_2753  | NA |
| Master_Control_19089 | NA |
| Master_Control_31923 | NA |
| Master_Control_2808  | NA |
| Master_Control_13466 | NA |
| Master_Control_24507 | NA |
| Master_Control_1342  | NA |
| Master_Control_9162  | NA |
| Master_Control_22325 | NA |
| Master_Control_18100 | NA |
| Master_Control_23600 | NA |
| Master_Control_21487 | NA |
| Master_Control_9270  | NA |
| Master_Control_21864 | NA |
| Master_Control_24271 | NA |



|                      |    |
|----------------------|----|
| Master_Control_91    | NA |
| Master_Control_25355 | NA |
| Master_Control_7102  | NA |
| Master_Control_18182 | NA |
| Master_Control_6019  | NA |
| Master_Control_19087 | NA |
| Master_Control_30494 | NA |
| Master_Control_8551  | NA |
| Master_Control_5200  | NA |
| Master_Control_20718 | NA |
| Master_Control_14115 | NA |
| Master_Control_20375 | NA |
| Master_Control_12646 | NA |
| Master_Control_30966 | NA |
| Master_Control_5581  | NA |
| Master_Control_16059 | NA |
| Master_Control_21306 | NA |
| Master_Control_14701 | NA |
| Master_Control_6543  | NA |
| Master_Control_8162  | NA |
| Master_Control_29702 | NA |
| Master_Control_25833 | NA |
| Master_Control_31228 | NA |
| Master_Control_20058 | NA |
| Master_Control_1617  | NA |
| Master_Control_11465 | NA |
| Master_Control_19143 | NA |
| Master_Control_32180 | NA |
| Master_Control_25575 | NA |
| Master_Control_25503 | NA |

**Table S8. Genes commonly up-regulated.**

| Unigene_ID            | Protein_Names                                              |
|-----------------------|------------------------------------------------------------|
| Master_Control_11791  | Meiotic recombination protein DMC1                         |
| Master_Control_1480   | Meiotic recombination protein DMC1                         |
| Master_Control_17708  | Meiotic recombination protein DMC1                         |
| Master_Control_26098  | Meiotic recombination protein DMC1                         |
| Master_Control_6445   | Meiotic recombination protein DMC1                         |
| Master_Control_1354   | NADH-dependent glutamate synthase 1 isoform 4              |
| Master_Control_142258 | NADH-dependent glutamate synthase 1 isoform 4              |
| Master_Control_189921 | NADH-dependent glutamate synthase 1 isoform 4              |
| Master_Control_21062  | NADH-dependent glutamate synthase 1 isoform 4              |
| Master_Control_27365  | NADH-dependent glutamate synthase 1 isoform 4              |
| Master_Control_9911   | NADH-dependent glutamate synthase 1 isoform 4              |
| Master_Control_87314  | Non-specific serine/threonine protein kinase (EC 2.7.11.1) |

|                       |                                                                                                                      |
|-----------------------|----------------------------------------------------------------------------------------------------------------------|
| Master_Control_192118 | Pto-like serine/threonine kinase                                                                                     |
| Master_Control_2284   | Putative leucine-rich repeat receptor-like serine/threonine-protein kinase                                           |
| Master_Control_17763  | Serine/threonine-protein kinase (EC 2.7.11.1)                                                                        |
| Master_Control_204216 | Serine-threonine protein kinase, plant-type, putative                                                                |
| Master_Control_10675  | Photosystem Q(B) protein (EC 1.10.3.9) (32 kDa thylakoid membrane protein) (Photosystem II protein D1)               |
| Master_Control_13345  | Photosystem Q(B) protein (EC 1.10.3.9) (32 kDa thylakoid membrane protein) (Photosystem II protein D1)               |
| Master_Control_13346  | Photosystem Q(B) protein (EC 1.10.3.9) (32 kDa thylakoid membrane protein) (Photosystem II protein D1)               |
| Master_Control_13412  | Photosystem Q(B) protein (EC 1.10.3.9) (32 kDa thylakoid membrane protein) (Photosystem II protein D1)               |
| Master_Control_15024  | Photosystem Q(B) protein (EC 1.10.3.9) (32 kDa thylakoid membrane protein) (Photosystem II protein D1)               |
| Master_Control_16322  | Photosystem Q(B) protein (EC 1.10.3.9) (32 kDa thylakoid membrane protein) (Photosystem II protein D1)               |
| Master_Control_23793  | Photosystem Q(B) protein (EC 1.10.3.9) (32 kDa thylakoid membrane protein) (Photosystem II protein D1)               |
| Master_Control_24489  | Photosystem Q(B) protein (EC 1.10.3.9) (32 kDa thylakoid membrane protein) (Photosystem II protein D1)               |
| Master_Control_3688   | Photosystem Q(B) protein (EC 1.10.3.9) (32 kDa thylakoid membrane protein) (Photosystem II protein D1)               |
| Master_Control_6331   | Photosystem Q(B) protein (EC 1.10.3.9) (32 kDa thylakoid membrane protein) (Photosystem II protein D1)               |
| Master_Control_6880   | Photosystem Q(B) protein (EC 1.10.3.9) (32 kDa thylakoid membrane protein) (Photosystem II protein D1)               |
| Master_Control_7115   | Photosystem Q(B) protein (EC 1.10.3.9) (32 kDa thylakoid membrane protein) (Photosystem II protein D1)               |
| Master_Control_8068   | Photosystem Q(B) protein (EC 1.10.3.9) (32 kDa thylakoid membrane protein) (Photosystem II protein D1)               |
| Master_Control_9524   | Photosystem Q(B) protein (EC 1.10.3.9) (32 kDa thylakoid membrane protein) (Photosystem II protein D1)               |
| Master_Control_113386 | (8,11)-linoleoyl desaturase (Fragment)                                                                               |
| Master_Control_178458 | 1-aminocyclopropapne-1-carboxylic acid oxidase                                                                       |
| Master_Control_135774 | 3-isopropylmalate dehydrogenase (Fragment)                                                                           |
| Master_Control_46457  | Albumin-2 protein (Hemopexin; D-tyrosyl-tRNA(Tyr) deacylase)                                                         |
| Master_Control_176432 | Alcohol dehydrogenases homologous                                                                                    |
| Master_Control_135821 | Anthocyanin malonyltransferase homolog                                                                               |
| Master_Control_136900 | AP-3 complex subunit beta                                                                                            |
| Master_Control_136901 | AP-3 complex subunit beta                                                                                            |
| Master_Control_52867  | AP-3 complex subunit beta                                                                                            |
| Master_Control_89848  | ARM repeat protein                                                                                                   |
| Master_Control_181591 | ATP synthase subunit b, chloroplastic (ATP synthase F(0) sector subunit b) (ATPase subunit I)                        |
| Master_Control_93043  | ATP synthase subunit beta, chloroplastic (EC 3.6.3.14) (ATP synthase F1 sector subunit beta) (F-ATPase subunit beta) |
| Master_Control_82518  | Beta-1,3-glucanase                                                                                                   |
| Master_Control_123816 | BnaA06g13620D protein                                                                                                |
| Master_Control_174056 | BnaA10g12960D protein                                                                                                |
| Master_Control_127057 | BnaC09g29270D protein                                                                                                |
| Master_Control_129888 | Broad substrate reductase/dehydrogenase                                                                              |
| Master_Control_129237 | Cell wall-associated hydrolase (Fragment)                                                                            |
| Master_Control_93682  | Cell wall-associated hydrolase (Fragment)                                                                            |
| Master_Control_187706 | Cyclophilin (Fragment)                                                                                               |
| Master_Control_186972 | Cytochrome b559 subunit alpha (PSII reaction center subunit V)                                                       |

|                       |                                                                                                                |
|-----------------------|----------------------------------------------------------------------------------------------------------------|
| Master_Control_79935  | DNA (cytosine-5)-methyltransferase (EC 2.1.1.37)                                                               |
| Master_Control_126963 | DNA polymerase (EC 2.7.7.7)                                                                                    |
| Master_Control_185933 | DNA polymerase (EC 2.7.7.7)                                                                                    |
| Master_Control_159264 | DNA topoisomerase 6 subunit A (EC 5.99.1.3)                                                                    |
| Master_Control_95306  | DNA-directed RNA polymerase subunit beta" (EC 2.7.7.6) (PEP)<br>(Plastid-encoded RNA polymerase subunit beta") |
| Master_Control_188886 | Endoplasmatic reticulum retrieval protein 1B isoform 1                                                         |
| Master_Control_189811 | ERECTA-like 1                                                                                                  |
| Master_Control_174015 | FAD2-8 protein (EC 1.14.19.6)                                                                                  |
| Master_Control_92902  | FAD2-8 protein (EC 1.14.19.6)                                                                                  |
| Master_Control_37933  | Glycerol-3-phosphate dehydrogenase [NAD()] (EC 1.1.1.8)                                                        |
| Master_Control_177038 | HVA22-like protein J, putative                                                                                 |
| Master_Control_26850  | Hydroxycinnamoyl-CoA:quininate hydroxycinnamoyltransferase                                                     |
| Master_Control_125767 | Late elongated hypocotyl-like                                                                                  |
| Master_Control_125769 | Late elongated hypocotyl-like                                                                                  |
| Master_Control_125770 | Late elongated hypocotyl-like                                                                                  |
| Master_Control_133587 | Lon protease homolog, mitochondrial (EC 3.4.21.-)                                                              |
| Master_Control_180335 | Maturase K (Intron maturase)                                                                                   |
| Master_Control_17725  | Midasin                                                                                                        |
| Master_Control_93407  | Midasin                                                                                                        |
| Master_Control_51537  | MUTS                                                                                                           |
| Master_Control_94864  | NADH-ubiquinone oxidoreductase chain 4 (EC 1.6.5.3)                                                            |
| Master_Control_105730 | NADPH--cytochrome P450 reductase (EC 1.6.2.4)                                                                  |
| Master_Control_128835 | Non-LTR retroelement reverse transcriptase-like protein                                                        |
| Master_Control_188488 | Non-LTR retroelement reverse transcriptase-like protein                                                        |
| Master_Control_15814  | Pectin lyase-like superfamily protein isoform 2                                                                |
| Master_Control_90659  | Phosphatase 2c, putative isoform 2                                                                             |
| Master_Control_97590  | Photosystem I P700 chlorophyll a apoprotein A1 (EC 1.97.1.12) (PSI-A)<br>(PsaA)                                |
| Master_Control_75599  | Polygalacturonase-inhibiting protein 4                                                                         |
| Master_Control_39115  | Polyphenol oxidase (EC 1.10.3.2)                                                                               |
| Master_Control_161290 | Predicted protein                                                                                              |
| Master_Control_179628 | Putative ethylene receptor ETR2                                                                                |
| Master_Control_115975 | Putative expansin (Fragment)                                                                                   |
| Master_Control_101176 | Replication factor-A carboxy-terminal domain protein                                                           |
| Master_Control_179833 | S-acyltransferase (EC 2.3.1.225) (Palmitoyltransferase)                                                        |
| Master_Control_187747 | Salt overly sensitive                                                                                          |
| Master_Control_17852  | Structural maintenance of chromosomes 6A, putative isoform 1                                                   |
| Master_Control_182811 | Subunit H2, putative                                                                                           |
| Master_Control_57072  | Tic20, putative                                                                                                |
| Master_Control_18101  | Trehalose 6-phosphate phosphatase (EC 3.1.3.12)                                                                |
| Master_Control_126262 | Zn-dependent exopeptidases superfamily protein                                                                 |
| Master_Control_134676 | Coffea canephora DH200=94 genomic scaffold, scaffold_135                                                       |
| Master_Control_175677 | Coffea canephora DH200=94 genomic scaffold, scaffold_19                                                        |
| Master_Control_187861 | Coffea canephora DH200=94 genomic scaffold, scaffold_19                                                        |
| Master_Control_191100 | Coffea canephora DH200=94 genomic scaffold, scaffold_21                                                        |
| Master_Control_188865 | Coffea canephora DH200=94 genomic scaffold, scaffold_3                                                         |
| Master_Control_37864  | Coffea canephora DH200=94 genomic scaffold, scaffold_45                                                        |
| Master_Control_83038  | Coffea canephora DH200=94 genomic scaffold, scaffold_5                                                         |
| Master_Control_150502 | Coffea canephora DH200=94 genomic scaffold, scaffold_6                                                         |
| Master_Control_40350  | Coffea canephora DH200=94 genomic scaffold, scaffold_68                                                        |
| Master_Control_73748  | Coffea canephora DH200=94 genomic scaffold, scaffold_7                                                         |
| Master_Control_163463 | Coffea canephora DH200=94 genomic scaffold, scaffold_92                                                        |

|                       |                                                    |
|-----------------------|----------------------------------------------------|
| Master_Control_98746  | Coronatine-insensitive 1 (Uncharacterized protein) |
| Master_Control_10642  | NA                                                 |
| Master_Control_10662  | NA                                                 |
| Master_Control_107496 | NA                                                 |
| Master_Control_113204 | NA                                                 |
| Master_Control_114132 | NA                                                 |
| Master_Control_114678 | NA                                                 |
| Master_Control_115664 | NA                                                 |
| Master_Control_117252 | NA                                                 |
| Master_Control_117888 | NA                                                 |
| Master_Control_119331 | NA                                                 |
| Master_Control_12048  | NA                                                 |
| Master_Control_12280  | NA                                                 |
| Master_Control_123244 | NA                                                 |
| Master_Control_126783 | NA                                                 |
| Master_Control_132268 | NA                                                 |
| Master_Control_134234 | NA                                                 |
| Master_Control_13555  | NA                                                 |
| Master_Control_136768 | NA                                                 |
| Master_Control_139216 | NA                                                 |
| Master_Control_13946  | NA                                                 |
| Master_Control_139756 | NA                                                 |
| Master_Control_139757 | NA                                                 |
| Master_Control_140192 | NA                                                 |
| Master_Control_141598 | NA                                                 |
| Master_Control_14385  | NA                                                 |
| Master_Control_1445   | NA                                                 |
| Master_Control_148095 | NA                                                 |
| Master_Control_152253 | NA                                                 |
| Master_Control_15276  | NA                                                 |
| Master_Control_157982 | NA                                                 |
| Master_Control_158343 | NA                                                 |
| Master_Control_161077 | NA                                                 |
| Master_Control_162223 | NA                                                 |
| Master_Control_162691 | NA                                                 |
| Master_Control_163471 | NA                                                 |
| Master_Control_163482 | NA                                                 |
| Master_Control_166190 | NA                                                 |
| Master_Control_166598 | NA                                                 |
| Master_Control_166613 | NA                                                 |
| Master_Control_167386 | NA                                                 |
| Master_Control_167406 | NA                                                 |
| Master_Control_169207 | NA                                                 |
| Master_Control_170567 | NA                                                 |
| Master_Control_171510 | NA                                                 |
| Master_Control_172404 | NA                                                 |
| Master_Control_175290 | NA                                                 |
| Master_Control_17871  | NA                                                 |
| Master_Control_185249 | NA                                                 |
| Master_Control_1890   | NA                                                 |
| Master_Control_190140 | NA                                                 |
| Master_Control_190255 | NA                                                 |

|                       |                                  |
|-----------------------|----------------------------------|
| Master_Control_191774 | NA                               |
| Master_Control_195127 | NA                               |
| Master_Control_196208 | NA                               |
| Master_Control_20198  | NA                               |
| Master_Control_24015  | NA                               |
| Master_Control_2411   | NA                               |
| Master_Control_24184  | NA                               |
| Master_Control_2670   | NA                               |
| Master_Control_27508  | NA                               |
| Master_Control_27566  | NA                               |
| Master_Control_27646  | NA                               |
| Master_Control_29971  | NA                               |
| Master_Control_30064  | NA                               |
| Master_Control_30829  | NA                               |
| Master_Control_31484  | NA                               |
| Master_Control_35404  | NA                               |
| Master_Control_35803  | NA                               |
| Master_Control_36024  | NA                               |
| Master_Control_37680  | NA                               |
| Master_Control_38485  | NA                               |
| Master_Control_412    | NA                               |
| Master_Control_41670  | NA                               |
| Master_Control_42542  | NA                               |
| Master_Control_44656  | NA                               |
| Master_Control_4636   | NA                               |
| Master_Control_47070  | NA                               |
| Master_Control_51541  | NA                               |
| Master_Control_57560  | NA                               |
| Master_Control_65992  | NA                               |
| Master_Control_67240  | NA                               |
| Master_Control_73116  | NA                               |
| Master_Control_75392  | NA                               |
| Master_Control_76499  | NA                               |
| Master_Control_78584  | NA                               |
| Master_Control_79416  | NA                               |
| Master_Control_80032  | NA                               |
| Master_Control_85343  | NA                               |
| Master_Control_86430  | NA                               |
| Master_Control_8718   | NA                               |
| Master_Control_88571  | NA                               |
| Master_Control_91415  | NA                               |
| Master_Control_9185   | NA                               |
| Master_Control_93     | NA                               |
| Master_Control_93352  | NA                               |
| Master_Control_96220  | NA                               |
| Master_Control_97247  | NA                               |
| Master_Control_97253  | NA                               |
| Master_Control_97260  | NA                               |
| Master_Control_98011  | NA                               |
| Master_Control_9811   | NA                               |
| Master_Control_100590 | Putative uncharacterized protein |
| Master_Control_125021 | Putative uncharacterized protein |

|                       |                                                         |
|-----------------------|---------------------------------------------------------|
| Master_Control_125114 | Putative uncharacterized protein                        |
| Master_Control_127672 | Putative uncharacterized protein                        |
| Master_Control_135075 | Putative uncharacterized protein                        |
| Master_Control_135826 | Putative uncharacterized protein                        |
| Master_Control_135827 | Putative uncharacterized protein                        |
| Master_Control_143170 | Putative uncharacterized protein                        |
| Master_Control_164084 | Putative uncharacterized protein                        |
| Master_Control_178975 | Putative uncharacterized protein                        |
| Master_Control_182232 | Putative uncharacterized protein                        |
| Master_Control_182233 | Putative uncharacterized protein                        |
| Master_Control_185896 | Putative uncharacterized protein                        |
| Master_Control_186537 | Putative uncharacterized protein                        |
| Master_Control_186813 | Putative uncharacterized protein                        |
| Master_Control_192094 | Putative uncharacterized protein                        |
| Master_Control_38726  | Putative uncharacterized protein                        |
| Master_Control_39288  | Putative uncharacterized protein                        |
| Master_Control_40066  | Putative uncharacterized protein                        |
| Master_Control_42428  | Putative uncharacterized protein                        |
| Master_Control_53730  | Putative uncharacterized protein                        |
| Master_Control_77554  | Putative uncharacterized protein                        |
| Master_Control_88119  | Putative uncharacterized protein                        |
| Master_Control_93995  | Putative uncharacterized protein                        |
| Master_Control_9967   | Putative uncharacterized protein                        |
| Master_Control_50521  | Putative uncharacterized protein (Fragment)             |
| Master_Control_3208   | Putative uncharacterized protein Sb04g017405 (Fragment) |
| Master_Control_11181  | Uncharacterized protein                                 |
| Master_Control_11280  | Uncharacterized protein                                 |
| Master_Control_113494 | Uncharacterized protein                                 |
| Master_Control_115820 | Uncharacterized protein                                 |
| Master_Control_117097 | Uncharacterized protein                                 |
| Master_Control_119720 | Uncharacterized protein                                 |
| Master_Control_121515 | Uncharacterized protein                                 |
| Master_Control_122443 | Uncharacterized protein                                 |
| Master_Control_122771 | Uncharacterized protein                                 |
| Master_Control_125028 | Uncharacterized protein                                 |
| Master_Control_125721 | Uncharacterized protein                                 |
| Master_Control_128482 | Uncharacterized protein                                 |
| Master_Control_131785 | Uncharacterized protein                                 |
| Master_Control_133767 | Uncharacterized protein                                 |
| Master_Control_133951 | Uncharacterized protein                                 |
| Master_Control_134172 | Uncharacterized protein                                 |
| Master_Control_135575 | Uncharacterized protein                                 |
| Master_Control_137991 | Uncharacterized protein                                 |
| Master_Control_141956 | Uncharacterized protein                                 |
| Master_Control_143939 | Uncharacterized protein                                 |
| Master_Control_14954  | Uncharacterized protein                                 |
| Master_Control_163848 | Uncharacterized protein                                 |
| Master_Control_164893 | Uncharacterized protein                                 |
| Master_Control_165869 | Uncharacterized protein                                 |
| Master_Control_166156 | Uncharacterized protein                                 |
| Master_Control_166540 | Uncharacterized protein                                 |
| Master_Control_168127 | Uncharacterized protein                                 |

|                       |                                    |
|-----------------------|------------------------------------|
| Master_Control_169338 | Uncharacterized protein            |
| Master_Control_171397 | Uncharacterized protein            |
| Master_Control_172635 | Uncharacterized protein            |
| Master_Control_1743   | Uncharacterized protein            |
| Master_Control_176395 | Uncharacterized protein            |
| Master_Control_177647 | Uncharacterized protein            |
| Master_Control_182500 | Uncharacterized protein            |
| Master_Control_183567 | Uncharacterized protein            |
| Master_Control_189966 | Uncharacterized protein            |
| Master_Control_192244 | Uncharacterized protein            |
| Master_Control_201253 | Uncharacterized protein            |
| Master_Control_21856  | Uncharacterized protein            |
| Master_Control_22197  | Uncharacterized protein            |
| Master_Control_24402  | Uncharacterized protein            |
| Master_Control_25094  | Uncharacterized protein            |
| Master_Control_28646  | Uncharacterized protein            |
| Master_Control_34017  | Uncharacterized protein            |
| Master_Control_34806  | Uncharacterized protein            |
| Master_Control_3523   | Uncharacterized protein            |
| Master_Control_37628  | Uncharacterized protein            |
| Master_Control_3831   | Uncharacterized protein            |
| Master_Control_38757  | Uncharacterized protein            |
| Master_Control_42698  | Uncharacterized protein            |
| Master_Control_44715  | Uncharacterized protein            |
| Master_Control_47166  | Uncharacterized protein            |
| Master_Control_50537  | Uncharacterized protein            |
| Master_Control_56461  | Uncharacterized protein            |
| Master_Control_58640  | Uncharacterized protein            |
| Master_Control_6635   | Uncharacterized protein            |
| Master_Control_7396   | Uncharacterized protein            |
| Master_Control_75573  | Uncharacterized protein            |
| Master_Control_76560  | Uncharacterized protein            |
| Master_Control_77280  | Uncharacterized protein            |
| Master_Control_78428  | Uncharacterized protein            |
| Master_Control_845    | Uncharacterized protein            |
| Master_Control_85307  | Uncharacterized protein            |
| Master_Control_87249  | Uncharacterized protein            |
| Master_Control_87646  | Uncharacterized protein            |
| Master_Control_88363  | Uncharacterized protein            |
| Master_Control_91858  | Uncharacterized protein            |
| Master_Control_9802   | Uncharacterized protein            |
| Master_Control_128631 | Uncharacterized protein (Fragment) |
| Master_Control_204336 | Uncharacterized protein (Fragment) |
| Master_Control_24785  | Uncharacterized protein (Fragment) |
| Master_Control_46876  | Uncharacterized protein (Fragment) |
| Master_Control_94296  | Uncharacterized protein (Fragment) |

**Table S9. transcripts commonly down-regulated.**

| Unigene_ID           | Protein_Names         |
|----------------------|-----------------------|
| Master_Control_31050 | Sucrose transporter   |
| Master_Control_17023 | Sucrose transporter 2 |

|                       |                                                  |
|-----------------------|--------------------------------------------------|
| Master_Control_19     | Sucrose transporter 2                            |
| Master_Control_6750   | Sucrose transporter 2                            |
| Master_Control_7792   | Sucrose transporter 2                            |
| Master_Control_132201 | N-acetylglucosaminyltransferase I (EC 2.4.1.101) |
| Master_Control_15718  | N-acetylglucosaminyltransferase I (EC 2.4.1.101) |
| Master_Control_19976  | N-acetylglucosaminyltransferase I (EC 2.4.1.101) |
| Master_Control_2180   | N-acetylglucosaminyltransferase I (EC 2.4.1.101) |
| Master_Control_22600  | N-acetylglucosaminyltransferase I (EC 2.4.1.101) |
| Master_Control_23401  | N-acetylglucosaminyltransferase I (EC 2.4.1.101) |
| Master_Control_25223  | N-acetylglucosaminyltransferase I (EC 2.4.1.101) |
| Master_Control_25664  | N-acetylglucosaminyltransferase I (EC 2.4.1.101) |
| Master_Control_26767  | N-acetylglucosaminyltransferase I (EC 2.4.1.101) |
| Master_Control_27272  | N-acetylglucosaminyltransferase I (EC 2.4.1.101) |
| Master_Control_29604  | N-acetylglucosaminyltransferase I (EC 2.4.1.101) |
| Master_Control_31267  | N-acetylglucosaminyltransferase I (EC 2.4.1.101) |
| Master_Control_31839  | N-acetylglucosaminyltransferase I (EC 2.4.1.101) |
| Master_Control_32368  | N-acetylglucosaminyltransferase I (EC 2.4.1.101) |
| Master_Control_4631   | N-acetylglucosaminyltransferase I (EC 2.4.1.101) |
| Master_Control_4848   | N-acetylglucosaminyltransferase I (EC 2.4.1.101) |
| Master_Control_15571  | CC-NBS-LRR                                       |
| Master_Control_3372   | CC-NBS-LRR resistance-like protein RGC203        |
| Master_Control_6510   | CC-NBS-LRR resistance-like protein RGC203        |
| Master_Control_9144   | CC-NBS-LRR resistance-like protein RGC203        |
| Master_Control_9564   | NBS protein (Fragment)                           |
| Master_Control_11570  | NBS-LRR protein                                  |
| Master_Control_8003   | NBS-LRR protein                                  |
| Master_Control_192907 | NBS-LRR resistance-like protein RGC260           |
| Master_Control_28378  | NBS-LRR resistance-like protein RGC260           |
| Master_Control_5256   | NBS-LRR resistance-like protein RGC260           |
| Master_Control_11773  | TIR-NBS-LRR resistance-like protein RGC151       |
| Master_Control_17300  | TIR-NBS-LRR resistance-like protein RGC151       |
| Master_Control_18084  | TIR-NBS-LRR resistance-like protein RGC151       |
| Master_Control_18284  | TIR-NBS-LRR resistance-like protein RGC151       |
| Master_Control_18305  | TIR-NBS-LRR resistance-like protein RGC151       |
| Master_Control_19314  | TIR-NBS-LRR resistance-like protein RGC151       |
| Master_Control_2570   | TIR-NBS-LRR resistance-like protein RGC151       |
| Master_Control_30774  | TIR-NBS-LRR resistance-like protein RGC151       |
| Master_Control_31700  | TIR-NBS-LRR resistance-like protein RGC151       |
| Master_Control_12119  | ATP-dependent DNA helicase PIF1                  |
| Master_Control_13322  | ATP-dependent DNA helicase PIF1                  |
| Master_Control_24937  | ATP-dependent DNA helicase PIF1                  |
| Master_Control_1178   | 17.6 kDa heat-shock protein                      |
| Master_Control_565    | 17.6 kDa heat-shock protein                      |
| Master_Control_11130  | 17.67 kDa heat-shock protein                     |
| Master_Control_21112  | 17.67 kDa heat-shock protein                     |
| Master_Control_323    | 17.67 kDa heat-shock protein                     |
| Master_Control_31836  | 17.7 KD class I small heat-shock protein         |
| Master_Control_19258  | 18.6 kDa heat-shock protein                      |
| Master_Control_10617  | Heat shock protein 60 isoform 1                  |
| Master_Control_21043  | Heat shock protein 60 isoform 1                  |
| Master_Control_28269  | Heat shock protein 60 isoform 1                  |
| Master_Control_5254   | Heat shock protein 60 isoform 1                  |



|                       |                                                                             |
|-----------------------|-----------------------------------------------------------------------------|
| Master_Control_59350  | Heat shock protein 60 isoform 1                                             |
| Master_Control_4719   | 1,2-beta-fructan 1F-fructosyltransferase (EC 2.4.1.100)                     |
| Master_Control_18256  | 2-alkenal reductase                                                         |
| Master_Control_18661  | 2-alkenal reductase                                                         |
| Master_Control_131474 | 50S ribosomal protein L16, chloroplastic                                    |
| Master_Control_24618  | 60I2G03 protein                                                             |
| Master_Control_20412  | Aldose 1-epimerase (EC 5.1.3.3) (Galactose mutarotase)                      |
| Master_Control_178486 | Alliinase family protein                                                    |
| Master_Control_280    | Alpha/beta hydrolase, putative                                              |
| Master_Control_49306  | Aquaporin SIP2.1 family protein                                             |
| Master_Control_27118  | At3g47680 (DNA binding protein) (Putative uncharacterized protein T23J7.10) |
| Master_Control_88374  | ATP synthase protein I-related protein (Fragment)                           |
| Master_Control_3311   | Beta-1,3-N-acetylglucosaminyltransferase family protein                     |
| Master_Control_46927  | Beta-caryophyllene synthase (EC 4.2.3.57)                                   |
| Master_Control_30628  | Beta-fructofuranosidase, putative                                           |
| Master_Control_52336  | Bifunctional dihydroflavonol 4-reductase/flavanone 4-reductase isoform 1    |
| Master_Control_127042 | BnaA07g15650D protein                                                       |
| Master_Control_194893 | BnaC02g21710D protein                                                       |
| Master_Control_18899  | Casein kinase I isoform delta-like protein                                  |
| Master_Control_1925   | Cellulose synthase 3B (Fragment)                                            |
| Master_Control_3234   | Centrin2 isoform 1                                                          |
| Master_Control_59353  | Chaperonin-60kD, ch60, putative                                             |
| Master_Control_30933  | Chloroplast RNA-binding protein 33                                          |
| Master_Control_30453  | ChNRRa                                                                      |
| Master_Control_40235  | ChNRRa                                                                      |
| Master_Control_19003  | Cinnamoyl-CoA reductase, putative (EC 1.1.1.219)                            |
| Master_Control_20960  | Cinnamoyl-CoA reductase, putative (EC 1.1.1.219)                            |
| Master_Control_16709  | Cold-shock DNA-binding family protein                                       |
| Master_Control_27154  | Common plant regulatory factor 6                                            |
| Master_Control_24789  | Condensin complex subunit 2                                                 |
| Master_Control_11884  | Cyclin-dependent kinase inhibitor 7                                         |
| Master_Control_8744   | Cytochrome P450 superfamily protein                                         |
| Master_Control_137837 | D-cysteine desulphydrase (Uncharacterized protein)                          |
| Master_Control_15422  | Dead box ATP-dependent RNA helicase, putative                               |
| Master_Control_23836  | Diphthamide biosynthesis protein, putative                                  |
| Master_Control_20024  | D-isomer specific 2-hydroxyacid dehydrogenase family protein                |
| Master_Control_179641 | DnaJ homolog subfamily C member 3 homolog                                   |
| Master_Control_10519  | DNase I-like superfamily protein                                            |
| Master_Control_31016  | Double bond reductase                                                       |
| Master_Control_53015  | DREB6-like protein                                                          |
| Master_Control_16448  | D-tyrosyl-tRNA(Tyr) deacylase (EC 3.1.-.-)                                  |
| Master_Control_170839 | Dual specificity protein phosphatase (DsPTP1) family protein isoform 1      |
| Master_Control_30876  | Early light-induced protein, chloroplastic (ELIP)                           |
| Master_Control_12453  | Endo-1,4-beta-xylanase C, putative (EC 3.2.1.8)                             |
| Master_Control_27232  | Endoglucanase (EC 3.2.1.4)                                                  |
| Master_Control_29751  | Extra-large GTP-binding protein 3                                           |
| Master_Control_15684  | FAR1; Zinc finger, SWIM-type                                                |
| Master_Control_28744  | F-box and associated interaction domains-containing-like protein            |
| Master_Control_23763  | F-box family protein                                                        |
| Master_Control_18034  | F-box family protein, putative isoform 4                                    |
| Master_Control_9210   | Ferric reduction oxidase 7 isoform 2                                        |

|                       |                                                                                                             |
|-----------------------|-------------------------------------------------------------------------------------------------------------|
| Master_Control_155077 | Flower development transporter PI                                                                           |
| Master_Control_183553 | Fructan:fructan 1-fructosyltransferase (EC 2.4.1.100)                                                       |
| Master_Control_22940  | Gag-Pol                                                                                                     |
| Master_Control_192660 | Gag-pol polymerase (Fragment)                                                                               |
| Master_Control_1154   | Glucose acyltransferase                                                                                     |
| Master_Control_136109 | GLUCOSE INSENSITIVE 1 family protein                                                                        |
| Master_Control_115066 | Glucose-6-phosphate 1-dehydrogenase (EC 1.1.1.49)                                                           |
| Master_Control_75441  | Glucose-6-phosphate 1-dehydrogenase (EC 1.1.1.49) (Fragment)                                                |
| Master_Control_182766 | Glucosyltransferase (EC 2.4.1.-)                                                                            |
| Master_Control_198100 | Glutamate dehydrogenase (Fragment)                                                                          |
| Master_Control_7518   | Glutamyl-tRNA(Gln) amidotransferase subunit A, chloroplastic/mitochondrial (Glu-AdT subunit A) (EC 6.3.5.7) |
| Master_Control_30563  | Glutathione S-transferase zeta class (EC 2.5.1.18)                                                          |
| Master_Control_7293   | Glycolate oxidase                                                                                           |
| Master_Control_14735  | Golgin candidate 6 isoform 2                                                                                |
| Master_Control_122656 | Hexokinase                                                                                                  |
| Master_Control_173496 | Hexokinase                                                                                                  |
| Master_Control_42438  | Histone deacetylase (EC 3.5.1.98)                                                                           |
| Master_Control_10904  | Hydrogen peroxide induced protein 1                                                                         |
| Master_Control_16999  | Hydroxycinnamoyl-CoA transferase 2                                                                          |
| Master_Control_40922  | Lactosylceramide 4-alpha-galactosyltransferase, putative (EC 2.4.1.228)                                     |
| Master_Control_50773  | Luminal binding protein                                                                                     |
| Master_Control_59355  | Malic enzyme                                                                                                |
| Master_Control_21312  | MIXTA-like 2                                                                                                |
| Master_Control_8483   | Mixta-like 2.3 protein (Fragment)                                                                           |
| Master_Control_184257 | MYB                                                                                                         |
| Master_Control_25079  | MYB1 protein                                                                                                |
| Master_Control_164739 | NAC-domain protein                                                                                          |
| Master_Control_4144   | NAD(P)-binding rossmann-fold protein                                                                        |
| Master_Control_15074  | NAD-dependent protein deacetylase (EC 3.5.1.-) (Regulatory protein SIR2 homolog)                            |
| Master_Control_11795  | Natural resistance-associated macrophage protein, putative                                                  |
| Master_Control_45633  | Nucleic acid binding protein, putative                                                                      |
| Master_Control_12993  | Nucleic acid-binding protein, putative                                                                      |
| Master_Control_20936  | Orf124 protein                                                                                              |
| Master_Control_5060   | Orf124 protein                                                                                              |
| Master_Control_162324 | Os01g0879800 protein                                                                                        |
| Master_Control_1159   | Os04g0283700 protein (Fragment)                                                                             |
| Master_Control_2325   | OSIGBa0134J07.9 protein                                                                                     |
| Master_Control_137287 | OSJNBa0074B10.9 protein                                                                                     |
| Master_Control_15444  | OSJNBa0074B10.9 protein                                                                                     |
| Master_Control_20847  | OSJNBa0074B10.9 protein                                                                                     |
| Master_Control_27973  | OSJNBa0074B10.9 protein                                                                                     |
| Master_Control_29266  | OSJNBa0074B10.9 protein                                                                                     |
| Master_Control_6246   | Pectate lyase (EC 4.2.2.2)                                                                                  |
| Master_Control_9757   | Pectate lyase (EC 4.2.2.2)                                                                                  |
| Master_Control_119264 | Pectinesterase (EC 3.1.1.11)                                                                                |
| Master_Control_26560  | Pentatricopeptide repeat-containing protein, putative                                                       |
| Master_Control_166085 | Peptidyl-prolyl cis-trans isomerase                                                                         |
| Master_Control_23175  | Peptidyl-prolyl cis-trans isomerase                                                                         |
| Master_Control_23032  | Peroxisomal membrane carrier protein (Uncharacterized protein)                                              |
| Master_Control_2215   | Phosphate transporter 1                                                                                     |
| Master_Control_24773  | Polyprotein                                                                                                 |

|                       |                                                                                   |
|-----------------------|-----------------------------------------------------------------------------------|
| Master_Control_21071  | Protein argonaute                                                                 |
| Master_Control_23860  | Protein phosphatase 2c, putative (EC 3.1.3.16)                                    |
| Master_Control_21374  | P-type ATPase                                                                     |
| Master_Control_21809  | P-type ATPase                                                                     |
| Master_Control_122654 | Purple acid phosphatase (EC 3.1.3.2)                                              |
| Master_Control_9641   | Putative arogenate dehydratase                                                    |
| Master_Control_13360  | Putative BPI/LBP family protein                                                   |
| Master_Control_29841  | Putative importin-7-like protein                                                  |
| Master_Control_26590  | Putative inactive purple acid phosphatase 27                                      |
| Master_Control_1524   | Putative polyprotein                                                              |
| Master_Control_12590  | Putative reverse transcriptase                                                    |
| Master_Control_29149  | Ribosomal protein L13                                                             |
| Master_Control_15989  | RNA binding protein, putative                                                     |
| Master_Control_10234  | RNI-like superfamily protein                                                      |
| Master_Control_23777  | RNI-like superfamily protein                                                      |
| Master_Control_13896  | RuBisCO large subunit-binding protein subunit alpha                               |
| Master_Control_18966  | Rubisco methyltransferase family protein (Uncharacterized protein)                |
| Master_Control_30975  | Rubisco methyltransferase family protein (Uncharacterized protein)                |
| Master_Control_129946 | Senescence-related gene 3 isoform 1                                               |
| Master_Control_23152  | Serine/threonine-protein phosphatase (EC 3.1.3.16)                                |
| Master_Control_475    | Sodium:hydrogen antiporter 1 (Fragment)                                           |
| Master_Control_21884  | Sodium-bile acid cotransporter, putative                                          |
| Master_Control_2828   | Sodium-bile acid cotransporter, putative                                          |
| Master_Control_8390   | Sterile nodes                                                                     |
| Master_Control_6007   | Systemin receptor SR160, putative (EC 1.3.1.74)                                   |
| Master_Control_27902  | T28P6.8 protein                                                                   |
| Master_Control_15984  | TLD-domain containing nucleolar protein isoform 2                                 |
| Master_Control_19142  | TMV resistance protein N, putative                                                |
| Master_Control_177959 | Transcription initiation factor IIE subunit beta                                  |
| Master_Control_23275  | Transducin/WD40 repeat-like superfamily protein                                   |
| Master_Control_25343  | Transducin/WD40 repeat-like superfamily protein                                   |
| Master_Control_2956   | Transducin/WD40 repeat-like superfamily protein                                   |
| Master_Control_22031  | Translation initiation factor IF-3                                                |
| Master_Control_25808  | Translation initiation factor IF-3                                                |
| Master_Control_3838   | Transmembrane Fragile-X-F-associated protein isoform 2                            |
| Master_Control_163996 | Transmembrane protein, putative                                                   |
| Master_Control_23216  | Ubiquitin-protein ligase, putative                                                |
| Master_Control_46260  | U-box domain-containing protein 26                                                |
| Master_Control_21625  | UDP-GlcNac-dolichyl-phosphate N-acetylglucosaminophosphotransferase (EC 2.7.8.15) |
| Master_Control_51074  | UDP-glycosyltransferase 73A17                                                     |
| Master_Control_189137 | UDP-glycosyltransferase 73C3                                                      |
| Master_Control_21420  | VDAC3.1 family protein                                                            |
| Master_Control_123078 | WRKY1 transcription factor                                                        |
| Master_Control_27243  | WRKY1 transcription factor                                                        |
| Master_Control_30487  | Zinc knuckle family protein, putative isoform 2                                   |
| Master_Control_8442   | ZIP family metal transporter                                                      |
| Master_Control_26877  | Coffea canephora DH200=94 genomic scaffold, scaffold_105                          |
| Master_Control_2001   | Coffea canephora DH200=94 genomic scaffold, scaffold_11                           |
| Master_Control_22065  | Coffea canephora DH200=94 genomic scaffold, scaffold_11624                        |
| Master_Control_76905  | Coffea canephora DH200=94 genomic scaffold, scaffold_144                          |
| Master_Control_7699   | Coffea canephora DH200=94 genomic scaffold, scaffold_15                           |

|                       |                                                          |
|-----------------------|----------------------------------------------------------|
| Master_Control_29253  | Coffea canephora DH200=94 genomic scaffold, scaffold_19  |
| Master_Control_3405   | Coffea canephora DH200=94 genomic scaffold, scaffold_19  |
| Master_Control_11995  | Coffea canephora DH200=94 genomic scaffold, scaffold_196 |
| Master_Control_10169  | Coffea canephora DH200=94 genomic scaffold, scaffold_2   |
| Master_Control_123186 | Coffea canephora DH200=94 genomic scaffold, scaffold_2   |
| Master_Control_28363  | Coffea canephora DH200=94 genomic scaffold, scaffold_2   |
| Master_Control_116953 | Coffea canephora DH200=94 genomic scaffold, scaffold_22  |
| Master_Control_30710  | Coffea canephora DH200=94 genomic scaffold, scaffold_22  |
| Master_Control_7882   | Coffea canephora DH200=94 genomic scaffold, scaffold_22  |
| Master_Control_56009  | Coffea canephora DH200=94 genomic scaffold, scaffold_23  |
| Master_Control_164738 | Coffea canephora DH200=94 genomic scaffold, scaffold_24  |
| Master_Control_5814   | Coffea canephora DH200=94 genomic scaffold, scaffold_256 |
| Master_Control_28819  | Coffea canephora DH200=94 genomic scaffold, scaffold_3   |
| Master_Control_13067  | Coffea canephora DH200=94 genomic scaffold, scaffold_30  |
| Master_Control_679    | Coffea canephora DH200=94 genomic scaffold, scaffold_30  |
| Master_Control_40902  | Coffea canephora DH200=94 genomic scaffold, scaffold_31  |
| Master_Control_21353  | Coffea canephora DH200=94 genomic scaffold, scaffold_34  |
| Master_Control_10625  | Coffea canephora DH200=94 genomic scaffold, scaffold_35  |
| Master_Control_160688 | Coffea canephora DH200=94 genomic scaffold, scaffold_35  |
| Master_Control_176004 | Coffea canephora DH200=94 genomic scaffold, scaffold_36  |
| Master_Control_21716  | Coffea canephora DH200=94 genomic scaffold, scaffold_36  |
| Master_Control_2751   | Coffea canephora DH200=94 genomic scaffold, scaffold_36  |
| Master_Control_24267  | Coffea canephora DH200=94 genomic scaffold, scaffold_38  |
| Master_Control_10056  | Coffea canephora DH200=94 genomic scaffold, scaffold_4   |
| Master_Control_1211   | Coffea canephora DH200=94 genomic scaffold, scaffold_4   |
| Master_Control_1590   | Coffea canephora DH200=94 genomic scaffold, scaffold_4   |
| Master_Control_18286  | Coffea canephora DH200=94 genomic scaffold, scaffold_4   |
| Master_Control_2163   | Coffea canephora DH200=94 genomic scaffold, scaffold_4   |
| Master_Control_26280  | Coffea canephora DH200=94 genomic scaffold, scaffold_4   |
| Master_Control_24124  | Coffea canephora DH200=94 genomic scaffold, scaffold_40  |
| Master_Control_17877  | Coffea canephora DH200=94 genomic scaffold, scaffold_41  |
| Master_Control_2608   | Coffea canephora DH200=94 genomic scaffold, scaffold_41  |
| Master_Control_128586 | Coffea canephora DH200=94 genomic scaffold, scaffold_45  |
| Master_Control_128587 | Coffea canephora DH200=94 genomic scaffold, scaffold_45  |
| Master_Control_27982  | Coffea canephora DH200=94 genomic scaffold, scaffold_45  |
| Master_Control_52984  | Coffea canephora DH200=94 genomic scaffold, scaffold_45  |
| Master_Control_21757  | Coffea canephora DH200=94 genomic scaffold, scaffold_5   |
| Master_Control_47462  | Coffea canephora DH200=94 genomic scaffold, scaffold_50  |
| Master_Control_11161  | Coffea canephora DH200=94 genomic scaffold, scaffold_53  |
| Master_Control_180825 | Coffea canephora DH200=94 genomic scaffold, scaffold_6   |
| Master_Control_27925  | Coffea canephora DH200=94 genomic scaffold, scaffold_62  |
| Master_Control_31000  | Coffea canephora DH200=94 genomic scaffold, scaffold_67  |
| Master_Control_29635  | Coffea canephora DH200=94 genomic scaffold, scaffold_75  |
| Master_Control_28942  | Coffea canephora DH200=94 genomic scaffold, scaffold_76  |
| Master_Control_11772  | Coffea canephora DH200=94 genomic scaffold, scaffold_763 |
| Master_Control_2594   | Coffea canephora DH200=94 genomic scaffold, scaffold_8   |
| Master_Control_29076  | Coffea canephora DH200=94 genomic scaffold, scaffold_8   |
| Master_Control_26493  | Coffea canephora DH200=94 genomic scaffold, scaffold_803 |
| Master_Control_32308  | Coffea canephora DH200=94 genomic scaffold, scaffold_87  |
| Master_Control_21706  | Coffea canephora DH200=94 genomic scaffold, scaffold_870 |
| Master_Control_22603  | Coffea canephora DH200=94 genomic scaffold, scaffold_870 |
| Master_Control_29448  | Coffea canephora DH200=94 genomic scaffold, scaffold_870 |

|                       |                                                         |
|-----------------------|---------------------------------------------------------|
| Master_Control_15402  | Coffea canephora DH200=94 genomic scaffold, scaffold_9  |
| Master_Control_2811   | Coffea canephora DH200=94 genomic scaffold, scaffold_9  |
| Master_Control_8930   | Coffea canephora DH200=94 genomic scaffold, scaffold_9  |
| Master_Control_5436   | Coffea canephora DH200=94 genomic scaffold, scaffold_91 |
| Master_Control_125013 | Coffea canephora DH200=94 genomic scaffold, scaffold_98 |
| Master_Control_39145  | Coffea canephora DH200=94 genomic scaffold, scaffold_98 |
| Master_Control_10148  | NA                                                      |
| Master_Control_10220  | NA                                                      |
| Master_Control_1024   | NA                                                      |
| Master_Control_10294  | NA                                                      |
| Master_Control_10309  | NA                                                      |
| Master_Control_10319  | NA                                                      |
| Master_Control_10417  | NA                                                      |
| Master_Control_10436  | NA                                                      |
| Master_Control_10578  | NA                                                      |
| Master_Control_105955 | NA                                                      |
| Master_Control_10645  | NA                                                      |
| Master_Control_1067   | NA                                                      |
| Master_Control_10707  | NA                                                      |
| Master_Control_1072   | NA                                                      |
| Master_Control_10755  | NA                                                      |
| Master_Control_10815  | NA                                                      |
| Master_Control_10834  | NA                                                      |
| Master_Control_10859  | NA                                                      |
| Master_Control_10920  | NA                                                      |
| Master_Control_11021  | NA                                                      |
| Master_Control_110658 | NA                                                      |
| Master_Control_11099  | NA                                                      |
| Master_Control_1119   | NA                                                      |
| Master_Control_11268  | NA                                                      |
| Master_Control_113683 | NA                                                      |
| Master_Control_11452  | NA                                                      |
| Master_Control_11456  | NA                                                      |
| Master_Control_115667 | NA                                                      |
| Master_Control_11589  | NA                                                      |
| Master_Control_116010 | NA                                                      |
| Master_Control_11608  | NA                                                      |
| Master_Control_11665  | NA                                                      |
| Master_Control_1169   | NA                                                      |
| Master_Control_11700  | NA                                                      |
| Master_Control_11702  | NA                                                      |
| Master_Control_117317 | NA                                                      |
| Master_Control_11762  | NA                                                      |
| Master_Control_11816  | NA                                                      |
| Master_Control_11892  | NA                                                      |
| Master_Control_11895  | NA                                                      |
| Master_Control_119436 | NA                                                      |
| Master_Control_11950  | NA                                                      |
| Master_Control_11959  | NA                                                      |
| Master_Control_120304 | NA                                                      |
| Master_Control_120507 | NA                                                      |
| Master_Control_12052  | NA                                                      |

|                       |    |
|-----------------------|----|
| Master_Control_121131 | NA |
| Master_Control_121422 | NA |
| Master_Control_12144  | NA |
| Master_Control_12145  | NA |
| Master_Control_12168  | NA |
| Master_Control_121944 | NA |
| Master_Control_12291  | NA |
| Master_Control_123299 | NA |
| Master_Control_12338  | NA |
| Master_Control_1234   | NA |
| Master_Control_12385  | NA |
| Master_Control_12558  | NA |
| Master_Control_125949 | NA |
| Master_Control_125956 | NA |
| Master_Control_12599  | NA |
| Master_Control_126881 | NA |
| Master_Control_12698  | NA |
| Master_Control_12702  | NA |
| Master_Control_12819  | NA |
| Master_Control_12842  | NA |
| Master_Control_12874  | NA |
| Master_Control_12898  | NA |
| Master_Control_12910  | NA |
| Master_Control_13023  | NA |
| Master_Control_13101  | NA |
| Master_Control_13175  | NA |
| Master_Control_13213  | NA |
| Master_Control_13283  | NA |
| Master_Control_133034 | NA |
| Master_Control_13406  | NA |
| Master_Control_13435  | NA |
| Master_Control_13459  | NA |
| Master_Control_13472  | NA |
| Master_Control_13548  | NA |
| Master_Control_136595 | NA |
| Master_Control_13667  | NA |
| Master_Control_13748  | NA |
| Master_Control_13770  | NA |
| Master_Control_13800  | NA |
| Master_Control_138815 | NA |
| Master_Control_139391 | NA |
| Master_Control_13990  | NA |
| Master_Control_14047  | NA |
| Master_Control_14067  | NA |
| Master_Control_141545 | NA |
| Master_Control_14159  | NA |
| Master_Control_141673 | NA |
| Master_Control_14178  | NA |
| Master_Control_142907 | NA |
| Master_Control_14295  | NA |
| Master_Control_14328  | NA |
| Master_Control_14329  | NA |

|                       |    |
|-----------------------|----|
| Master_Control_143727 | NA |
| Master_Control_14388  | NA |
| Master_Control_145    | NA |
| Master_Control_146273 | NA |
| Master_Control_14656  | NA |
| Master_Control_1475   | NA |
| Master_Control_14771  | NA |
| Master_Control_147990 | NA |
| Master_Control_1488   | NA |
| Master_Control_148879 | NA |
| Master_Control_149011 | NA |
| Master_Control_149629 | NA |
| Master_Control_14989  | NA |
| Master_Control_150415 | NA |
| Master_Control_15086  | NA |
| Master_Control_150877 | NA |
| Master_Control_15103  | NA |
| Master_Control_15149  | NA |
| Master_Control_15232  | NA |
| Master_Control_15270  | NA |
| Master_Control_153121 | NA |
| Master_Control_153240 | NA |
| Master_Control_15335  | NA |
| Master_Control_153368 | NA |
| Master_Control_15360  | NA |
| Master_Control_15424  | NA |
| Master_Control_154925 | NA |
| Master_Control_15587  | NA |
| Master_Control_15652  | NA |
| Master_Control_156667 | NA |
| Master_Control_15697  | NA |
| Master_Control_15803  | NA |
| Master_Control_15835  | NA |
| Master_Control_15847  | NA |
| Master_Control_159543 | NA |
| Master_Control_159795 | NA |
| Master_Control_16022  | NA |
| Master_Control_16037  | NA |
| Master_Control_161635 | NA |
| Master_Control_161866 | NA |
| Master_Control_16210  | NA |
| Master_Control_16214  | NA |
| Master_Control_162524 | NA |
| Master_Control_162554 | NA |
| Master_Control_162557 | NA |
| Master_Control_162575 | NA |
| Master_Control_16260  | NA |
| Master_Control_162656 | NA |
| Master_Control_16284  | NA |
| Master_Control_1629   | NA |
| Master_Control_162998 | NA |
| Master_Control_16363  | NA |

|                       |    |
|-----------------------|----|
| Master_Control_1638   | NA |
| Master_Control_163908 | NA |
| Master_Control_164002 | NA |
| Master_Control_16406  | NA |
| Master_Control_164334 | NA |
| Master_Control_164384 | NA |
| Master_Control_164429 | NA |
| Master_Control_16453  | NA |
| Master_Control_165180 | NA |
| Master_Control_16556  | NA |
| Master_Control_16561  | NA |
| Master_Control_166255 | NA |
| Master_Control_16673  | NA |
| Master_Control_166895 | NA |
| Master_Control_16741  | NA |
| Master_Control_16748  | NA |
| Master_Control_167726 | NA |
| Master_Control_167859 | NA |
| Master_Control_167862 | NA |
| Master_Control_168037 | NA |
| Master_Control_168358 | NA |
| Master_Control_1684   | NA |
| Master_Control_16841  | NA |
| Master_Control_168678 | NA |
| Master_Control_16945  | NA |
| Master_Control_169843 | NA |
| Master_Control_170545 | NA |
| Master_Control_17090  | NA |
| Master_Control_17096  | NA |
| Master_Control_171239 | NA |
| Master_Control_171695 | NA |
| Master_Control_1720   | NA |
| Master_Control_17223  | NA |
| Master_Control_1726   | NA |
| Master_Control_17261  | NA |
| Master_Control_17306  | NA |
| Master_Control_17324  | NA |
| Master_Control_17334  | NA |
| Master_Control_17507  | NA |
| Master_Control_17521  | NA |
| Master_Control_17547  | NA |
| Master_Control_17569  | NA |
| Master_Control_17601  | NA |
| Master_Control_176153 | NA |
| Master_Control_177430 | NA |
| Master_Control_17751  | NA |
| Master_Control_17822  | NA |
| Master_Control_179432 | NA |
| Master_Control_17950  | NA |
| Master_Control_18005  | NA |
| Master_Control_18083  | NA |
| Master_Control_182302 | NA |



|                       |    |
|-----------------------|----|
| Master_Control_18277  | NA |
| Master_Control_1830   | NA |
| Master_Control_18362  | NA |
| Master_Control_18397  | NA |
| Master_Control_18432  | NA |
| Master_Control_184498 | NA |
| Master_Control_184501 | NA |
| Master_Control_185280 | NA |
| Master_Control_18590  | NA |
| Master_Control_18725  | NA |
| Master_Control_187959 | NA |
| Master_Control_188004 | NA |
| Master_Control_18808  | NA |
| Master_Control_18866  | NA |
| Master_Control_18881  | NA |
| Master_Control_18907  | NA |
| Master_Control_18974  | NA |
| Master_Control_190374 | NA |
| Master_Control_19169  | NA |
| Master_Control_1917   | NA |
| Master_Control_192158 | NA |
| Master_Control_192528 | NA |
| Master_Control_19290  | NA |
| Master_Control_1930   | NA |
| Master_Control_19353  | NA |
| Master_Control_19382  | NA |
| Master_Control_193993 | NA |
| Master_Control_194157 | NA |
| Master_Control_19426  | NA |
| Master_Control_19540  | NA |
| Master_Control_19593  | NA |
| Master_Control_19614  | NA |
| Master_Control_19685  | NA |
| Master_Control_1969   | NA |
| Master_Control_19760  | NA |
| Master_Control_198180 | NA |
| Master_Control_19919  | NA |
| Master_Control_199437 | NA |
| Master_Control_20002  | NA |
| Master_Control_20016  | NA |
| Master_Control_20021  | NA |
| Master_Control_200288 | NA |
| Master_Control_20052  | NA |
| Master_Control_20082  | NA |
| Master_Control_20092  | NA |
| Master_Control_201019 | NA |
| Master_Control_20119  | NA |
| Master_Control_201930 | NA |
| Master_Control_202073 | NA |
| Master_Control_202114 | NA |
| Master_Control_20228  | NA |
| Master_Control_202318 | NA |

|                       |    |
|-----------------------|----|
| Master_Control_20296  | NA |
| Master_Control_2030   | NA |
| Master_Control_203001 | NA |
| Master_Control_203596 | NA |
| Master_Control_203749 | NA |
| Master_Control_204896 | NA |
| Master_Control_20567  | NA |
| Master_Control_20616  | NA |
| Master_Control_20635  | NA |
| Master_Control_20655  | NA |
| Master_Control_20657  | NA |
| Master_Control_206986 | NA |
| Master_Control_20726  | NA |
| Master_Control_20734  | NA |
| Master_Control_208569 | NA |
| Master_Control_20933  | NA |
| Master_Control_20961  | NA |
| Master_Control_21039  | NA |
| Master_Control_21172  | NA |
| Master_Control_21185  | NA |
| Master_Control_21201  | NA |
| Master_Control_21301  | NA |
| Master_Control_21435  | NA |
| Master_Control_21440  | NA |
| Master_Control_21468  | NA |
| Master_Control_21471  | NA |
| Master_Control_2149   | NA |
| Master_Control_2150   | NA |
| Master_Control_21634  | NA |
| Master_Control_21835  | NA |
| Master_Control_21904  | NA |
| Master_Control_21909  | NA |
| Master_Control_22004  | NA |
| Master_Control_22112  | NA |
| Master_Control_22166  | NA |
| Master_Control_22207  | NA |
| Master_Control_22266  | NA |
| Master_Control_22329  | NA |
| Master_Control_22361  | NA |
| Master_Control_22368  | NA |
| Master_Control_22392  | NA |
| Master_Control_22433  | NA |
| Master_Control_22510  | NA |
| Master_Control_22562  | NA |
| Master_Control_22619  | NA |
| Master_Control_22678  | NA |
| Master_Control_22701  | NA |
| Master_Control_22724  | NA |
| Master_Control_22725  | NA |
| Master_Control_22746  | NA |
| Master_Control_22823  | NA |
| Master_Control_22829  | NA |

|                      |    |
|----------------------|----|
| Master_Control_22918 | NA |
| Master_Control_22938 | NA |
| Master_Control_22964 | NA |
| Master_Control_22965 | NA |
| Master_Control_22972 | NA |
| Master_Control_23195 | NA |
| Master_Control_2323  | NA |
| Master_Control_23323 | NA |
| Master_Control_2349  | NA |
| Master_Control_2351  | NA |
| Master_Control_23547 | NA |
| Master_Control_2359  | NA |
| Master_Control_23622 | NA |
| Master_Control_23709 | NA |
| Master_Control_23713 | NA |
| Master_Control_23735 | NA |
| Master_Control_23820 | NA |
| Master_Control_23853 | NA |
| Master_Control_23897 | NA |
| Master_Control_24249 | NA |
| Master_Control_24253 | NA |
| Master_Control_24305 | NA |
| Master_Control_24420 | NA |
| Master_Control_24582 | NA |
| Master_Control_24583 | NA |
| Master_Control_24642 | NA |
| Master_Control_24711 | NA |
| Master_Control_24713 | NA |
| Master_Control_24747 | NA |
| Master_Control_24921 | NA |
| Master_Control_24928 | NA |
| Master_Control_24964 | NA |
| Master_Control_25014 | NA |
| Master_Control_25068 | NA |
| Master_Control_25147 | NA |
| Master_Control_25261 | NA |
| Master_Control_25297 | NA |
| Master_Control_25404 | NA |
| Master_Control_25556 | NA |
| Master_Control_25579 | NA |
| Master_Control_25588 | NA |
| Master_Control_25590 | NA |
| Master_Control_25683 | NA |
| Master_Control_25753 | NA |
| Master_Control_25837 | NA |
| Master_Control_25857 | NA |
| Master_Control_25930 | NA |
| Master_Control_2601  | NA |
| Master_Control_26054 | NA |
| Master_Control_26122 | NA |
| Master_Control_26124 | NA |
| Master_Control_26140 | NA |

|                      |    |
|----------------------|----|
| Master_Control_2623  | NA |
| Master_Control_26456 | NA |
| Master_Control_26618 | NA |
| Master_Control_26648 | NA |
| Master_Control_26708 | NA |
| Master_Control_26789 | NA |
| Master_Control_268   | NA |
| Master_Control_26803 | NA |
| Master_Control_26935 | NA |
| Master_Control_27078 | NA |
| Master_Control_2710  | NA |
| Master_Control_27130 | NA |
| Master_Control_2725  | NA |
| Master_Control_27300 | NA |
| Master_Control_27366 | NA |
| Master_Control_27372 | NA |
| Master_Control_27414 | NA |
| Master_Control_27437 | NA |
| Master_Control_27462 | NA |
| Master_Control_27465 | NA |
| Master_Control_27534 | NA |
| Master_Control_27565 | NA |
| Master_Control_27576 | NA |
| Master_Control_27589 | NA |
| Master_Control_27704 | NA |
| Master_Control_27785 | NA |
| Master_Control_2782  | NA |
| Master_Control_27996 | NA |
| Master_Control_28084 | NA |
| Master_Control_28096 | NA |
| Master_Control_28117 | NA |
| Master_Control_28178 | NA |
| Master_Control_2822  | NA |
| Master_Control_28276 | NA |
| Master_Control_28282 | NA |
| Master_Control_28533 | NA |
| Master_Control_28632 | NA |
| Master_Control_2868  | NA |
| Master_Control_28697 | NA |
| Master_Control_28728 | NA |
| Master_Control_28869 | NA |
| Master_Control_28877 | NA |
| Master_Control_28921 | NA |
| Master_Control_28952 | NA |
| Master_Control_28982 | NA |
| Master_Control_29036 | NA |
| Master_Control_29131 | NA |
| Master_Control_29177 | NA |
| Master_Control_29211 | NA |
| Master_Control_29311 | NA |
| Master_Control_29322 | NA |
| Master_Control_29331 | NA |

|                      |    |
|----------------------|----|
| Master_Control_29358 | NA |
| Master_Control_29444 | NA |
| Master_Control_29449 | NA |
| Master_Control_295   | NA |
| Master_Control_29645 | NA |
| Master_Control_2967  | NA |
| Master_Control_29699 | NA |
| Master_Control_29739 | NA |
| Master_Control_29829 | NA |
| Master_Control_29899 | NA |
| Master_Control_29946 | NA |
| Master_Control_29962 | NA |
| Master_Control_29981 | NA |
| Master_Control_29990 | NA |
| Master_Control_30157 | NA |
| Master_Control_30179 | NA |
| Master_Control_30184 | NA |
| Master_Control_30197 | NA |
| Master_Control_30291 | NA |
| Master_Control_30556 | NA |
| Master_Control_30601 | NA |
| Master_Control_30632 | NA |
| Master_Control_30763 | NA |
| Master_Control_30823 | NA |
| Master_Control_30831 | NA |
| Master_Control_30868 | NA |
| Master_Control_30937 | NA |
| Master_Control_3094  | NA |
| Master_Control_30946 | NA |
| Master_Control_31106 | NA |
| Master_Control_31169 | NA |
| Master_Control_31223 | NA |
| Master_Control_31243 | NA |
| Master_Control_31245 | NA |
| Master_Control_3125  | NA |
| Master_Control_31257 | NA |
| Master_Control_31308 | NA |
| Master_Control_31319 | NA |
| Master_Control_31369 | NA |
| Master_Control_31665 | NA |
| Master_Control_31671 | NA |
| Master_Control_31788 | NA |
| Master_Control_31807 | NA |
| Master_Control_31826 | NA |
| Master_Control_31889 | NA |
| Master_Control_3191  | NA |
| Master_Control_32200 | NA |
| Master_Control_32206 | NA |
| Master_Control_32250 | NA |
| Master_Control_32286 | NA |
| Master_Control_32291 | NA |
| Master_Control_32299 | NA |

|                      |    |
|----------------------|----|
| Master_Control_32327 | NA |
| Master_Control_32336 | NA |
| Master_Control_32372 | NA |
| Master_Control_32446 | NA |
| Master_Control_32452 | NA |
| Master_Control_33461 | NA |
| Master_Control_3351  | NA |
| Master_Control_3356  | NA |
| Master_Control_3453  | NA |
| Master_Control_34656 | NA |
| Master_Control_34841 | NA |
| Master_Control_3522  | NA |
| Master_Control_36095 | NA |
| Master_Control_37533 | NA |
| Master_Control_37785 | NA |
| Master_Control_37902 | NA |
| Master_Control_38112 | NA |
| Master_Control_38294 | NA |
| Master_Control_402   | NA |
| Master_Control_4092  | NA |
| Master_Control_4093  | NA |
| Master_Control_41180 | NA |
| Master_Control_4152  | NA |
| Master_Control_4187  | NA |
| Master_Control_42067 | NA |
| Master_Control_4253  | NA |
| Master_Control_42961 | NA |
| Master_Control_42992 | NA |
| Master_Control_44116 | NA |
| Master_Control_4433  | NA |
| Master_Control_4455  | NA |
| Master_Control_4486  | NA |
| Master_Control_4523  | NA |
| Master_Control_4578  | NA |
| Master_Control_45827 | NA |
| Master_Control_4605  | NA |
| Master_Control_4619  | NA |
| Master_Control_462   | NA |
| Master_Control_4625  | NA |
| Master_Control_470   | NA |
| Master_Control_4789  | NA |
| Master_Control_4862  | NA |
| Master_Control_4864  | NA |
| Master_Control_5043  | NA |
| Master_Control_5102  | NA |
| Master_Control_5159  | NA |
| Master_Control_52959 | NA |
| Master_Control_5433  | NA |
| Master_Control_5478  | NA |
| Master_Control_5608  | NA |
| Master_Control_5683  | NA |
| Master_Control_5782  | NA |

|                      |    |
|----------------------|----|
| Master_Control_5880  | NA |
| Master_Control_5889  | NA |
| Master_Control_5908  | NA |
| Master_Control_59756 | NA |
| Master_Control_601   | NA |
| Master_Control_6068  | NA |
| Master_Control_6073  | NA |
| Master_Control_6140  | NA |
| Master_Control_6191  | NA |
| Master_Control_62051 | NA |
| Master_Control_6258  | NA |
| Master_Control_637   | NA |
| Master_Control_64074 | NA |
| Master_Control_6439  | NA |
| Master_Control_6470  | NA |
| Master_Control_65259 | NA |
| Master_Control_6638  | NA |
| Master_Control_66683 | NA |
| Master_Control_67650 | NA |
| Master_Control_6785  | NA |
| Master_Control_6806  | NA |
| Master_Control_6848  | NA |
| Master_Control_6850  | NA |
| Master_Control_68783 | NA |
| Master_Control_69123 | NA |
| Master_Control_69142 | NA |
| Master_Control_6916  | NA |
| Master_Control_6931  | NA |
| Master_Control_6991  | NA |
| Master_Control_7022  | NA |
| Master_Control_7147  | NA |
| Master_Control_71493 | NA |
| Master_Control_717   | NA |
| Master_Control_7170  | NA |
| Master_Control_71705 | NA |
| Master_Control_72011 | NA |
| Master_Control_7262  | NA |
| Master_Control_7297  | NA |
| Master_Control_7325  | NA |
| Master_Control_7388  | NA |
| Master_Control_7415  | NA |
| Master_Control_75156 | NA |
| Master_Control_75272 | NA |
| Master_Control_7568  | NA |
| Master_Control_7574  | NA |
| Master_Control_7606  | NA |
| Master_Control_7638  | NA |
| Master_Control_767   | NA |
| Master_Control_7864  | NA |
| Master_Control_79107 | NA |
| Master_Control_79108 | NA |
| Master_Control_8083  | NA |

|                      |                                  |
|----------------------|----------------------------------|
| Master_Control_8113  | NA                               |
| Master_Control_8129  | NA                               |
| Master_Control_8292  | NA                               |
| Master_Control_8321  | NA                               |
| Master_Control_8342  | NA                               |
| Master_Control_836   | NA                               |
| Master_Control_8364  | NA                               |
| Master_Control_8371  | NA                               |
| Master_Control_8530  | NA                               |
| Master_Control_85407 | NA                               |
| Master_Control_8556  | NA                               |
| Master_Control_86030 | NA                               |
| Master_Control_8607  | NA                               |
| Master_Control_8641  | NA                               |
| Master_Control_86905 | NA                               |
| Master_Control_8796  | NA                               |
| Master_Control_8820  | NA                               |
| Master_Control_8824  | NA                               |
| Master_Control_8892  | NA                               |
| Master_Control_8902  | NA                               |
| Master_Control_8909  | NA                               |
| Master_Control_8990  | NA                               |
| Master_Control_9008  | NA                               |
| Master_Control_9039  | NA                               |
| Master_Control_9047  | NA                               |
| Master_Control_9052  | NA                               |
| Master_Control_9080  | NA                               |
| Master_Control_9093  | NA                               |
| Master_Control_9123  | NA                               |
| Master_Control_9224  | NA                               |
| Master_Control_9325  | NA                               |
| Master_Control_933   | NA                               |
| Master_Control_9422  | NA                               |
| Master_Control_9431  | NA                               |
| Master_Control_9463  | NA                               |
| Master_Control_9476  | NA                               |
| Master_Control_9496  | NA                               |
| Master_Control_95609 | NA                               |
| Master_Control_9561  | NA                               |
| Master_Control_9566  | NA                               |
| Master_Control_9618  | NA                               |
| Master_Control_9648  | NA                               |
| Master_Control_9670  | NA                               |
| Master_Control_9816  | NA                               |
| Master_Control_9873  | NA                               |
| Master_Control_9892  | NA                               |
| Master_Control_9960  | NA                               |
| Master_Control_9991  | NA                               |
| Master_Control_10914 | Putative uncharacterized protein |
| Master_Control_13009 | Putative uncharacterized protein |
| Master_Control_13282 | Putative uncharacterized protein |
| Master_Control_13339 | Putative uncharacterized protein |



|                       |                                  |
|-----------------------|----------------------------------|
| Master_Control_13426  | Putative uncharacterized protein |
| Master_Control_13660  | Putative uncharacterized protein |
| Master_Control_139306 | Putative uncharacterized protein |
| Master_Control_140875 | Putative uncharacterized protein |
| Master_Control_15583  | Putative uncharacterized protein |
| Master_Control_15887  | Putative uncharacterized protein |
| Master_Control_16367  | Putative uncharacterized protein |
| Master_Control_16566  | Putative uncharacterized protein |
| Master_Control_166097 | Putative uncharacterized protein |
| Master_Control_16970  | Putative uncharacterized protein |
| Master_Control_173634 | Putative uncharacterized protein |
| Master_Control_17434  | Putative uncharacterized protein |
| Master_Control_17465  | Putative uncharacterized protein |
| Master_Control_175241 | Putative uncharacterized protein |
| Master_Control_177747 | Putative uncharacterized protein |
| Master_Control_17923  | Putative uncharacterized protein |
| Master_Control_179640 | Putative uncharacterized protein |
| Master_Control_18002  | Putative uncharacterized protein |
| Master_Control_18042  | Putative uncharacterized protein |
| Master_Control_18056  | Putative uncharacterized protein |
| Master_Control_18424  | Putative uncharacterized protein |
| Master_Control_18664  | Putative uncharacterized protein |
| Master_Control_18732  | Putative uncharacterized protein |
| Master_Control_18776  | Putative uncharacterized protein |
| Master_Control_19055  | Putative uncharacterized protein |
| Master_Control_19139  | Putative uncharacterized protein |
| Master_Control_19537  | Putative uncharacterized protein |
| Master_Control_19818  | Putative uncharacterized protein |
| Master_Control_19877  | Putative uncharacterized protein |
| Master_Control_19880  | Putative uncharacterized protein |
| Master_Control_20490  | Putative uncharacterized protein |
| Master_Control_20962  | Putative uncharacterized protein |
| Master_Control_20963  | Putative uncharacterized protein |
| Master_Control_210    | Putative uncharacterized protein |
| Master_Control_21624  | Putative uncharacterized protein |
| Master_Control_21839  | Putative uncharacterized protein |
| Master_Control_22084  | Putative uncharacterized protein |
| Master_Control_22160  | Putative uncharacterized protein |
| Master_Control_22371  | Putative uncharacterized protein |
| Master_Control_22713  | Putative uncharacterized protein |
| Master_Control_23146  | Putative uncharacterized protein |
| Master_Control_23624  | Putative uncharacterized protein |
| Master_Control_24037  | Putative uncharacterized protein |
| Master_Control_24165  | Putative uncharacterized protein |
| Master_Control_25656  | Putative uncharacterized protein |
| Master_Control_25762  | Putative uncharacterized protein |
| Master_Control_26290  | Putative uncharacterized protein |
| Master_Control_26610  | Putative uncharacterized protein |
| Master_Control_2841   | Putative uncharacterized protein |
| Master_Control_28772  | Putative uncharacterized protein |
| Master_Control_28774  | Putative uncharacterized protein |
| Master_Control_29130  | Putative uncharacterized protein |

|                       |                                                                      |
|-----------------------|----------------------------------------------------------------------|
| Master_Control_29313  | Putative uncharacterized protein                                     |
| Master_Control_29408  | Putative uncharacterized protein                                     |
| Master_Control_29677  | Putative uncharacterized protein                                     |
| Master_Control_29766  | Putative uncharacterized protein                                     |
| Master_Control_29987  | Putative uncharacterized protein                                     |
| Master_Control_30177  | Putative uncharacterized protein                                     |
| Master_Control_30658  | Putative uncharacterized protein                                     |
| Master_Control_30871  | Putative uncharacterized protein                                     |
| Master_Control_31081  | Putative uncharacterized protein                                     |
| Master_Control_31284  | Putative uncharacterized protein                                     |
| Master_Control_31914  | Putative uncharacterized protein                                     |
| Master_Control_32227  | Putative uncharacterized protein                                     |
| Master_Control_3347   | Putative uncharacterized protein                                     |
| Master_Control_3591   | Putative uncharacterized protein                                     |
| Master_Control_4282   | Putative uncharacterized protein                                     |
| Master_Control_4718   | Putative uncharacterized protein                                     |
| Master_Control_50303  | Putative uncharacterized protein                                     |
| Master_Control_58525  | Putative uncharacterized protein                                     |
| Master_Control_5942   | Putative uncharacterized protein                                     |
| Master_Control_6127   | Putative uncharacterized protein                                     |
| Master_Control_6225   | Putative uncharacterized protein                                     |
| Master_Control_6565   | Putative uncharacterized protein                                     |
| Master_Control_6790   | Putative uncharacterized protein                                     |
| Master_Control_76929  | Putative uncharacterized protein                                     |
| Master_Control_7898   | Putative uncharacterized protein                                     |
| Master_Control_8314   | Putative uncharacterized protein                                     |
| Master_Control_8408   | Putative uncharacterized protein                                     |
| Master_Control_85973  | Putative uncharacterized protein                                     |
| Master_Control_8893   | Putative uncharacterized protein                                     |
| Master_Control_918    | Putative uncharacterized protein                                     |
| Master_Control_9337   | Putative uncharacterized protein                                     |
| Master_Control_9515   | Putative uncharacterized protein                                     |
| Master_Control_97729  | Putative uncharacterized protein                                     |
| Master_Control_9862   | Putative uncharacterized protein                                     |
| Master_Control_10262  | Putative uncharacterized protein (Fragment)                          |
| Master_Control_193018 | Putative uncharacterized protein At2g36410 (Uncharacterized protein) |
| Master_Control_22431  | Putative uncharacterized protein Sb02g006460                         |
| Master_Control_100097 | Uncharacterized protein                                              |
| Master_Control_10107  | Uncharacterized protein                                              |
| Master_Control_10564  | Uncharacterized protein                                              |
| Master_Control_10748  | Uncharacterized protein                                              |
| Master_Control_1084   | Uncharacterized protein                                              |
| Master_Control_10886  | Uncharacterized protein                                              |
| Master_Control_10917  | Uncharacterized protein                                              |
| Master_Control_10948  | Uncharacterized protein                                              |
| Master_Control_109579 | Uncharacterized protein                                              |
| Master_Control_11110  | Uncharacterized protein                                              |
| Master_Control_11145  | Uncharacterized protein                                              |
| Master_Control_11326  | Uncharacterized protein                                              |
| Master_Control_11436  | Uncharacterized protein                                              |
| Master_Control_11454  | Uncharacterized protein                                              |
| Master_Control_11528  | Uncharacterized protein                                              |

|                       |                         |
|-----------------------|-------------------------|
| Master_Control_11758  | Uncharacterized protein |
| Master_Control_1176   | Uncharacterized protein |
| Master_Control_11770  | Uncharacterized protein |
| Master_Control_118565 | Uncharacterized protein |
| Master_Control_11946  | Uncharacterized protein |
| Master_Control_12067  | Uncharacterized protein |
| Master_Control_122516 | Uncharacterized protein |
| Master_Control_12421  | Uncharacterized protein |
| Master_Control_12456  | Uncharacterized protein |
| Master_Control_12670  | Uncharacterized protein |
| Master_Control_127364 | Uncharacterized protein |
| Master_Control_127800 | Uncharacterized protein |
| Master_Control_12953  | Uncharacterized protein |
| Master_Control_13048  | Uncharacterized protein |
| Master_Control_13172  | Uncharacterized protein |
| Master_Control_13332  | Uncharacterized protein |
| Master_Control_13354  | Uncharacterized protein |
| Master_Control_13460  | Uncharacterized protein |
| Master_Control_13468  | Uncharacterized protein |
| Master_Control_13572  | Uncharacterized protein |
| Master_Control_138870 | Uncharacterized protein |
| Master_Control_13891  | Uncharacterized protein |
| Master_Control_139104 | Uncharacterized protein |
| Master_Control_140124 | Uncharacterized protein |
| Master_Control_14031  | Uncharacterized protein |
| Master_Control_14352  | Uncharacterized protein |
| Master_Control_14704  | Uncharacterized protein |
| Master_Control_14962  | Uncharacterized protein |
| Master_Control_15289  | Uncharacterized protein |
| Master_Control_1534   | Uncharacterized protein |
| Master_Control_15502  | Uncharacterized protein |
| Master_Control_15540  | Uncharacterized protein |
| Master_Control_15623  | Uncharacterized protein |
| Master_Control_16118  | Uncharacterized protein |
| Master_Control_16137  | Uncharacterized protein |
| Master_Control_1628   | Uncharacterized protein |
| Master_Control_162992 | Uncharacterized protein |
| Master_Control_16583  | Uncharacterized protein |
| Master_Control_166463 | Uncharacterized protein |
| Master_Control_16647  | Uncharacterized protein |
| Master_Control_16707  | Uncharacterized protein |
| Master_Control_16730  | Uncharacterized protein |
| Master_Control_167546 | Uncharacterized protein |
| Master_Control_16872  | Uncharacterized protein |
| Master_Control_16896  | Uncharacterized protein |
| Master_Control_17012  | Uncharacterized protein |
| Master_Control_17019  | Uncharacterized protein |
| Master_Control_1719   | Uncharacterized protein |
| Master_Control_17233  | Uncharacterized protein |
| Master_Control_17250  | Uncharacterized protein |
| Master_Control_17309  | Uncharacterized protein |
| Master_Control_17328  | Uncharacterized protein |

|                       |                         |
|-----------------------|-------------------------|
| Master_Control_17340  | Uncharacterized protein |
| Master_Control_174376 | Uncharacterized protein |
| Master_Control_17464  | Uncharacterized protein |
| Master_Control_17512  | Uncharacterized protein |
| Master_Control_17517  | Uncharacterized protein |
| Master_Control_17534  | Uncharacterized protein |
| Master_Control_176106 | Uncharacterized protein |
| Master_Control_1763   | Uncharacterized protein |
| Master_Control_17678  | Uncharacterized protein |
| Master_Control_177154 | Uncharacterized protein |
| Master_Control_177211 | Uncharacterized protein |
| Master_Control_177486 | Uncharacterized protein |
| Master_Control_17847  | Uncharacterized protein |
| Master_Control_17880  | Uncharacterized protein |
| Master_Control_17943  | Uncharacterized protein |
| Master_Control_179790 | Uncharacterized protein |
| Master_Control_185587 | Uncharacterized protein |
| Master_Control_185882 | Uncharacterized protein |
| Master_Control_186113 | Uncharacterized protein |
| Master_Control_18642  | Uncharacterized protein |
| Master_Control_18656  | Uncharacterized protein |
| Master_Control_18692  | Uncharacterized protein |
| Master_Control_18704  | Uncharacterized protein |
| Master_Control_18748  | Uncharacterized protein |
| Master_Control_188311 | Uncharacterized protein |
| Master_Control_18921  | Uncharacterized protein |
| Master_Control_189242 | Uncharacterized protein |
| Master_Control_189960 | Uncharacterized protein |
| Master_Control_19141  | Uncharacterized protein |
| Master_Control_191570 | Uncharacterized protein |
| Master_Control_191786 | Uncharacterized protein |
| Master_Control_19253  | Uncharacterized protein |
| Master_Control_1948   | Uncharacterized protein |
| Master_Control_19520  | Uncharacterized protein |
| Master_Control_19636  | Uncharacterized protein |
| Master_Control_19981  | Uncharacterized protein |
| Master_Control_20206  | Uncharacterized protein |
| Master_Control_20207  | Uncharacterized protein |
| Master_Control_20315  | Uncharacterized protein |
| Master_Control_20318  | Uncharacterized protein |
| Master_Control_20527  | Uncharacterized protein |
| Master_Control_20709  | Uncharacterized protein |
| Master_Control_20856  | Uncharacterized protein |
| Master_Control_20939  | Uncharacterized protein |
| Master_Control_21064  | Uncharacterized protein |
| Master_Control_21162  | Uncharacterized protein |
| Master_Control_21264  | Uncharacterized protein |
| Master_Control_21520  | Uncharacterized protein |
| Master_Control_21604  | Uncharacterized protein |
| Master_Control_21861  | Uncharacterized protein |
| Master_Control_22293  | Uncharacterized protein |
| Master_Control_22525  | Uncharacterized protein |

|                      |                         |
|----------------------|-------------------------|
| Master_Control_23002 | Uncharacterized protein |
| Master_Control_23015 | Uncharacterized protein |
| Master_Control_23111 | Uncharacterized protein |
| Master_Control_23136 | Uncharacterized protein |
| Master_Control_23174 | Uncharacterized protein |
| Master_Control_23184 | Uncharacterized protein |
| Master_Control_23325 | Uncharacterized protein |
| Master_Control_2338  | Uncharacterized protein |
| Master_Control_23454 | Uncharacterized protein |
| Master_Control_23731 | Uncharacterized protein |
| Master_Control_23826 | Uncharacterized protein |
| Master_Control_24050 | Uncharacterized protein |
| Master_Control_24151 | Uncharacterized protein |
| Master_Control_24245 | Uncharacterized protein |
| Master_Control_2436  | Uncharacterized protein |
| Master_Control_24863 | Uncharacterized protein |
| Master_Control_24870 | Uncharacterized protein |
| Master_Control_24924 | Uncharacterized protein |
| Master_Control_24960 | Uncharacterized protein |
| Master_Control_25119 | Uncharacterized protein |
| Master_Control_2531  | Uncharacterized protein |
| Master_Control_25721 | Uncharacterized protein |
| Master_Control_25769 | Uncharacterized protein |
| Master_Control_25866 | Uncharacterized protein |
| Master_Control_2602  | Uncharacterized protein |
| Master_Control_2627  | Uncharacterized protein |
| Master_Control_26316 | Uncharacterized protein |
| Master_Control_26365 | Uncharacterized protein |
| Master_Control_26474 | Uncharacterized protein |
| Master_Control_26720 | Uncharacterized protein |
| Master_Control_26790 | Uncharacterized protein |
| Master_Control_26809 | Uncharacterized protein |
| Master_Control_27050 | Uncharacterized protein |
| Master_Control_27051 | Uncharacterized protein |
| Master_Control_2720  | Uncharacterized protein |
| Master_Control_2764  | Uncharacterized protein |
| Master_Control_28234 | Uncharacterized protein |
| Master_Control_28248 | Uncharacterized protein |
| Master_Control_28333 | Uncharacterized protein |
| Master_Control_28530 | Uncharacterized protein |
| Master_Control_28554 | Uncharacterized protein |
| Master_Control_28556 | Uncharacterized protein |
| Master_Control_28610 | Uncharacterized protein |
| Master_Control_2875  | Uncharacterized protein |
| Master_Control_28863 | Uncharacterized protein |
| Master_Control_29028 | Uncharacterized protein |
| Master_Control_29053 | Uncharacterized protein |
| Master_Control_29066 | Uncharacterized protein |
| Master_Control_29099 | Uncharacterized protein |
| Master_Control_29138 | Uncharacterized protein |
| Master_Control_29355 | Uncharacterized protein |
| Master_Control_2968  | Uncharacterized protein |

|                      |                         |
|----------------------|-------------------------|
| Master_Control_29725 | Uncharacterized protein |
| Master_Control_29940 | Uncharacterized protein |
| Master_Control_2997  | Uncharacterized protein |
| Master_Control_30264 | Uncharacterized protein |
| Master_Control_30553 | Uncharacterized protein |
| Master_Control_30600 | Uncharacterized protein |
| Master_Control_30744 | Uncharacterized protein |
| Master_Control_30862 | Uncharacterized protein |
| Master_Control_30875 | Uncharacterized protein |
| Master_Control_30922 | Uncharacterized protein |
| Master_Control_30979 | Uncharacterized protein |
| Master_Control_31155 | Uncharacterized protein |
| Master_Control_31157 | Uncharacterized protein |
| Master_Control_31268 | Uncharacterized protein |
| Master_Control_31350 | Uncharacterized protein |
| Master_Control_31360 | Uncharacterized protein |
| Master_Control_3150  | Uncharacterized protein |
| Master_Control_3196  | Uncharacterized protein |
| Master_Control_32006 | Uncharacterized protein |
| Master_Control_32100 | Uncharacterized protein |
| Master_Control_32239 | Uncharacterized protein |
| Master_Control_32249 | Uncharacterized protein |
| Master_Control_32268 | Uncharacterized protein |
| Master_Control_32415 | Uncharacterized protein |
| Master_Control_3262  | Uncharacterized protein |
| Master_Control_3386  | Uncharacterized protein |
| Master_Control_34406 | Uncharacterized protein |
| Master_Control_3447  | Uncharacterized protein |
| Master_Control_3482  | Uncharacterized protein |
| Master_Control_3486  | Uncharacterized protein |
| Master_Control_3514  | Uncharacterized protein |
| Master_Control_3542  | Uncharacterized protein |
| Master_Control_3643  | Uncharacterized protein |
| Master_Control_37305 | Uncharacterized protein |
| Master_Control_37931 | Uncharacterized protein |
| Master_Control_3849  | Uncharacterized protein |
| Master_Control_3889  | Uncharacterized protein |
| Master_Control_3893  | Uncharacterized protein |
| Master_Control_39704 | Uncharacterized protein |
| Master_Control_4038  | Uncharacterized protein |
| Master_Control_4075  | Uncharacterized protein |
| Master_Control_41046 | Uncharacterized protein |
| Master_Control_42046 | Uncharacterized protein |
| Master_Control_4384  | Uncharacterized protein |
| Master_Control_4390  | Uncharacterized protein |
| Master_Control_43920 | Uncharacterized protein |
| Master_Control_43922 | Uncharacterized protein |
| Master_Control_463   | Uncharacterized protein |
| Master_Control_48759 | Uncharacterized protein |
| Master_Control_4972  | Uncharacterized protein |
| Master_Control_5012  | Uncharacterized protein |
| Master_Control_5014  | Uncharacterized protein |

|                      |                                    |
|----------------------|------------------------------------|
| Master_Control_5138  | Uncharacterized protein            |
| Master_Control_5163  | Uncharacterized protein            |
| Master_Control_5286  | Uncharacterized protein            |
| Master_Control_52985 | Uncharacterized protein            |
| Master_Control_56130 | Uncharacterized protein            |
| Master_Control_5621  | Uncharacterized protein            |
| Master_Control_5625  | Uncharacterized protein            |
| Master_Control_5691  | Uncharacterized protein            |
| Master_Control_5703  | Uncharacterized protein            |
| Master_Control_5845  | Uncharacterized protein            |
| Master_Control_59357 | Uncharacterized protein            |
| Master_Control_6198  | Uncharacterized protein            |
| Master_Control_6314  | Uncharacterized protein            |
| Master_Control_6410  | Uncharacterized protein            |
| Master_Control_6478  | Uncharacterized protein            |
| Master_Control_6654  | Uncharacterized protein            |
| Master_Control_6679  | Uncharacterized protein            |
| Master_Control_6883  | Uncharacterized protein            |
| Master_Control_69987 | Uncharacterized protein            |
| Master_Control_7116  | Uncharacterized protein            |
| Master_Control_7152  | Uncharacterized protein            |
| Master_Control_7290  | Uncharacterized protein            |
| Master_Control_7395  | Uncharacterized protein            |
| Master_Control_7432  | Uncharacterized protein            |
| Master_Control_7534  | Uncharacterized protein            |
| Master_Control_7633  | Uncharacterized protein            |
| Master_Control_8252  | Uncharacterized protein            |
| Master_Control_8331  | Uncharacterized protein            |
| Master_Control_8374  | Uncharacterized protein            |
| Master_Control_8389  | Uncharacterized protein            |
| Master_Control_8675  | Uncharacterized protein            |
| Master_Control_8694  | Uncharacterized protein            |
| Master_Control_8923  | Uncharacterized protein            |
| Master_Control_9247  | Uncharacterized protein            |
| Master_Control_9398  | Uncharacterized protein            |
| Master_Control_9443  | Uncharacterized protein            |
| Master_Control_9525  | Uncharacterized protein            |
| Master_Control_9586  | Uncharacterized protein            |
| Master_Control_959   | Uncharacterized protein            |
| Master_Control_9974  | Uncharacterized protein            |
| Master_Control_12971 | Uncharacterized protein (Fragment) |
| Master_Control_157   | Uncharacterized protein (Fragment) |
| Master_Control_1573  | Uncharacterized protein (Fragment) |
| Master_Control_17940 | Uncharacterized protein (Fragment) |
| Master_Control_20293 | Uncharacterized protein (Fragment) |
| Master_Control_22007 | Uncharacterized protein (Fragment) |
| Master_Control_25920 | Uncharacterized protein (Fragment) |
| Master_Control_26401 | Uncharacterized protein (Fragment) |
| Master_Control_27888 | Uncharacterized protein (Fragment) |
| Master_Control_29054 | Uncharacterized protein (Fragment) |
| Master_Control_29542 | Uncharacterized protein (Fragment) |
| Master_Control_3101  | Uncharacterized protein (Fragment) |

|                      |                                    |
|----------------------|------------------------------------|
| Master_Control_31902 | Uncharacterized protein (Fragment) |
| Master_Control_3758  | Uncharacterized protein (Fragment) |
| Master_Control_4090  | Uncharacterized protein (Fragment) |
| Master_Control_4744  | Uncharacterized protein (Fragment) |
| Master_Control_5037  | Uncharacterized protein (Fragment) |
| Master_Control_5648  | Uncharacterized protein (Fragment) |
| Master_Control_6842  | Uncharacterized protein (Fragment) |
| Master_Control_7220  | Uncharacterized protein (Fragment) |
| Master_Control_81565 | Uncharacterized protein (Fragment) |
| Master_Control_9083  | Uncharacterized protein (Fragment) |

**Table S10. List of primers**

| Primer                   | Sequence                        |
|--------------------------|---------------------------------|
| <b>Real time primers</b> | <b>Primer sequence</b>          |
| mc_15684_F               | 5' TGACATAGGTTTCATTGCGGAAA 3'   |
| mc_15684_R               | 5' ACAAGTGGCTAAGTGACATGTTTG 3'  |
| mc_17923_F               | 5' CAGTACCCGTAGAGCTTCACAATG 3'  |
| mc_17923_R               | 5' TTGATCGCAACAGCTTCTTGA 3'     |
| mc_18042_F               | 5' CAGACAAGGTAGCGATGGACTCT 3'   |
| mc_18042_R               | 5' TTGGTGCTTTCATTCACTCGAA 3'    |
| mc_125770_F              | 5' TTTGCCGTGGTTGAATCATG 3'      |
| mc_125770_R              | 5' TGATGGTAAATTAACACCGAGCTAA 3' |
| mc_126262_F              | 5' GCTCCAATAATTGCTGCCACTA 3'    |
| mc_126262_R              | 5' TGGAATGATGGGCTCTCTT 3'       |
| mc_105730_F              | 5' GTTCTGGCCGAAGTTTGAC 3'       |
| mc_105730_R              | 5' GCCACATTGGCTCTTATTGGA 3'     |
| mc_113386_F              | 5' CGAATGACAGATCGTTCAAAGC 3'    |
| mc_113386_R              | 5' CCCAGTTGATCCACCGTTCT 3'      |
| ADS_F                    | 5' GAATGGTGACCGCTCTTCCTT 3'     |
| ADS_R                    | 5' GATTGCTTGAACGCTCCATTTT 3'    |
| DXS_F                    | 5' GTGGGACCGGGATGAATTTA 3'      |
| DXS_R                    | 5' GTCCTTCGCACGCCAATC 3'        |
| HMGR_F                   | 5' CAAAAGCCTCAGACGCATT 3'       |
| HMGR_R                   | 5' GATCTTGTCGCGCCATCTGT 3'      |
| mc_76560_F               | 5' TGATAAGTTTTCGCTTTGTTTAGC 3'  |
| mc_76560_R               | 5' AAGGCCCGTCGCCTAAAA 3'        |
| mc_3514_F                | 5' TGACCCAATAATCGAATCAAGACTT 3' |
| mc_3514_R                | 5' TGCTTCAAGGCGATTTCATCA 3'     |
| mc_122443_F              | 5' AGCAAGTTCAAAGCTTTCAAAA 3'    |
| mc_122443_R              | 5' GATCTCTCGATTGGATGTGTATGC 3'  |
| mc_11791_F               | 5' TGCCGACGTTTGGGATGT 3'        |
| mc_11791_R               | 5' CCCGTAGGCGTGCCACTA 3'        |
| FPPS_F                   | 5' CGATGATTCCCGTCAATGG 3'       |
| FPPS_R                   | 5' CCCCAGTTTCAGCTTTCCT 3'       |



|                                                        |                                    |
|--------------------------------------------------------|------------------------------------|
| DBR2_F                                                 | 5' AGCATCCCATCAAGTGTACCAA 3'       |
| DBR2_R                                                 | 5' AATGGGCTTGCTTGTGATGA 3'         |
| ACTIN_F                                                | 5' GAATGGTTAAGGCTGGATTTGCA 3'      |
| ACTIN_R                                                | 5' CGGTAATTTCTTGCTCATCCTATC 3'     |
| mc_43833_F                                             | 5' GCCTATCTGGTGCCCATGAC 3'         |
| mc_43833_R                                             | 5' TGTTATCCCAAAGCAAACGATT 3'       |
| mc_96454_F                                             | 5' CAGACCGTCTAACTGCTCATGAA 3'      |
| mc_96454_R                                             | 5' TCAGGAGCAACACCATTTTCG 3'        |
| EGF-1alpha_F                                           | 5' AGCCCAAGAGACCATCAGACA 3'        |
| EGF-1alpha_R                                           | 5'TTCCAATACCACCAATCTTGTAACA 3'     |
| <b>Primers (for stress specific TFs amplification)</b> | <b>Primer sequence</b>             |
| c22337_g1_i1_F                                         | 5' CACACTTGCTTCCTCTACC 3'          |
| c22337_g1_i1_R                                         | 5' GTCACTAGACTGCGGGATAG 3'         |
| c27716_g3_i4_F                                         | 5' GTTTAAAGTACACACATAGTTAAGAAAC 3' |
| c27716_g3_i4_R                                         | 5' GTTGACTCCTCCATCTTCTTA 3'        |
| c20206_g1_i3_F                                         | 5' TGTGAACCAAATTATATCCATCTA 3'     |
| c20206_g1_i3_R                                         | 5' ATCAAAACGCATGTCATTG 3'          |
| c44388_g1_i1_F                                         | TTGTTTCATAGAAAGCGATTAA             |
| c44388_g1_i1_R                                         | TCGAAGCTAATATAAATGCACA             |
| c42073_g1_i1_F                                         | ATACTATCTACTGCTCCATCTCGA           |
| c42073_g1_i1_R                                         | TTTTGAAGCCTAGTGGGA                 |
| c21577_g1_i1_F                                         | GTGAAACTACCAACAAATCTATCCATA        |
| c21577_g1_i1_R                                         | GCATTGAATCCTGACTTGTTT              |
| c44152_g1_i1_F                                         | TCTTCAAGATTTGCTAGGGTT              |
| c44152_g1_i1_R                                         | CTTAACACACATTTTTGCTTTC             |
| c31649_g1_i3_F                                         | CCCAACTGAAACAAGAAGAAA              |
| c31649_g1_i3_R                                         | GTTACCATGTGCACACCAAAA              |
| c31442_g4_i1_F                                         | GAAAGCATAGTATTTATAGTACTGAAT        |
| c31442_g4_i1_R                                         | TATACGACTATACGGCTGATG              |
| c16201_g1_i1_F                                         | CAGCCTCAAAGAAAAAGAAAG              |
| c16201_g1_i1_R                                         | TCATACTTGGTGGAAATATAAAATT          |

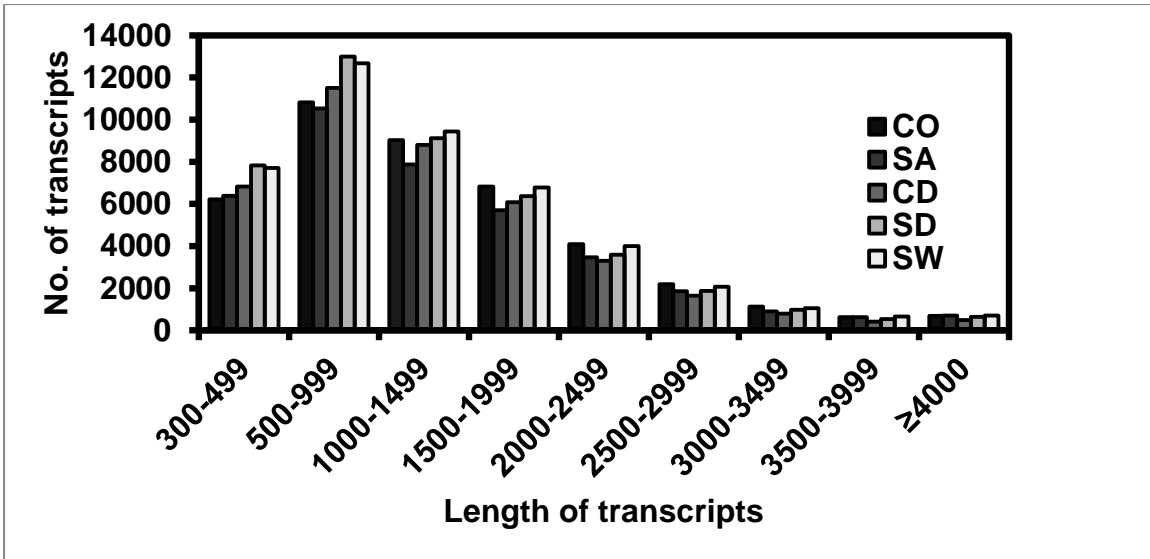

**Figure S1. Size distribution of the assembled transcripts.** Length of assembled transcripts vs. Number of transcripts plotted for *A. annua* control(CO), salinity(SA), cold(CD), severe drought(SD) and severe water-logging(SW) stress samples.

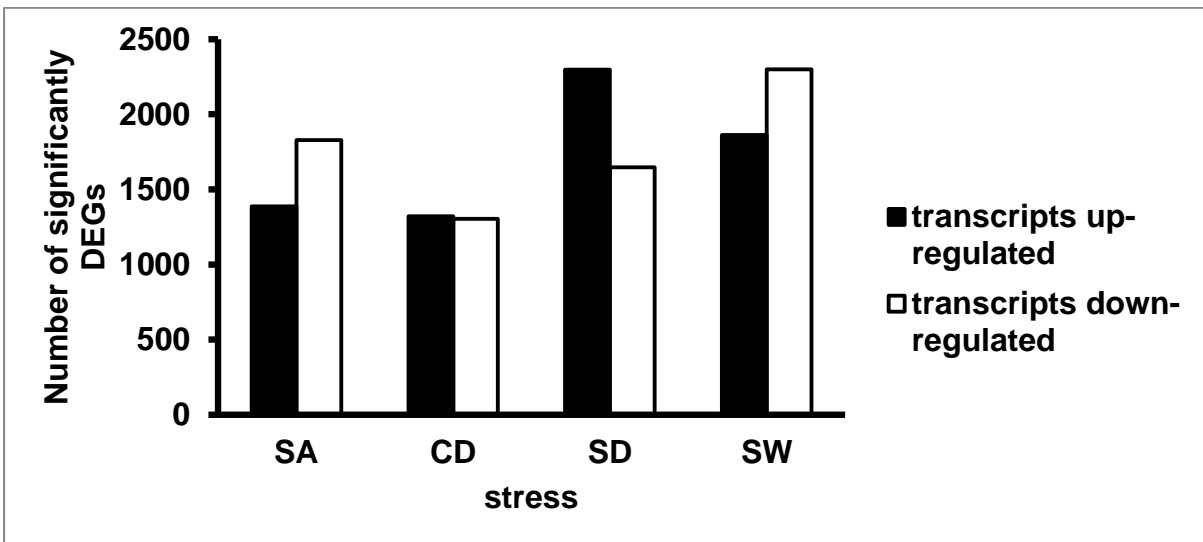

**Figure S2. The number of DEGs up- and down- regulated in each library.** The DEGs were identified using a threshold of  $p \text{ value} \leq 0.05$  and  $\log_2 \text{ fold change} \geq 1$

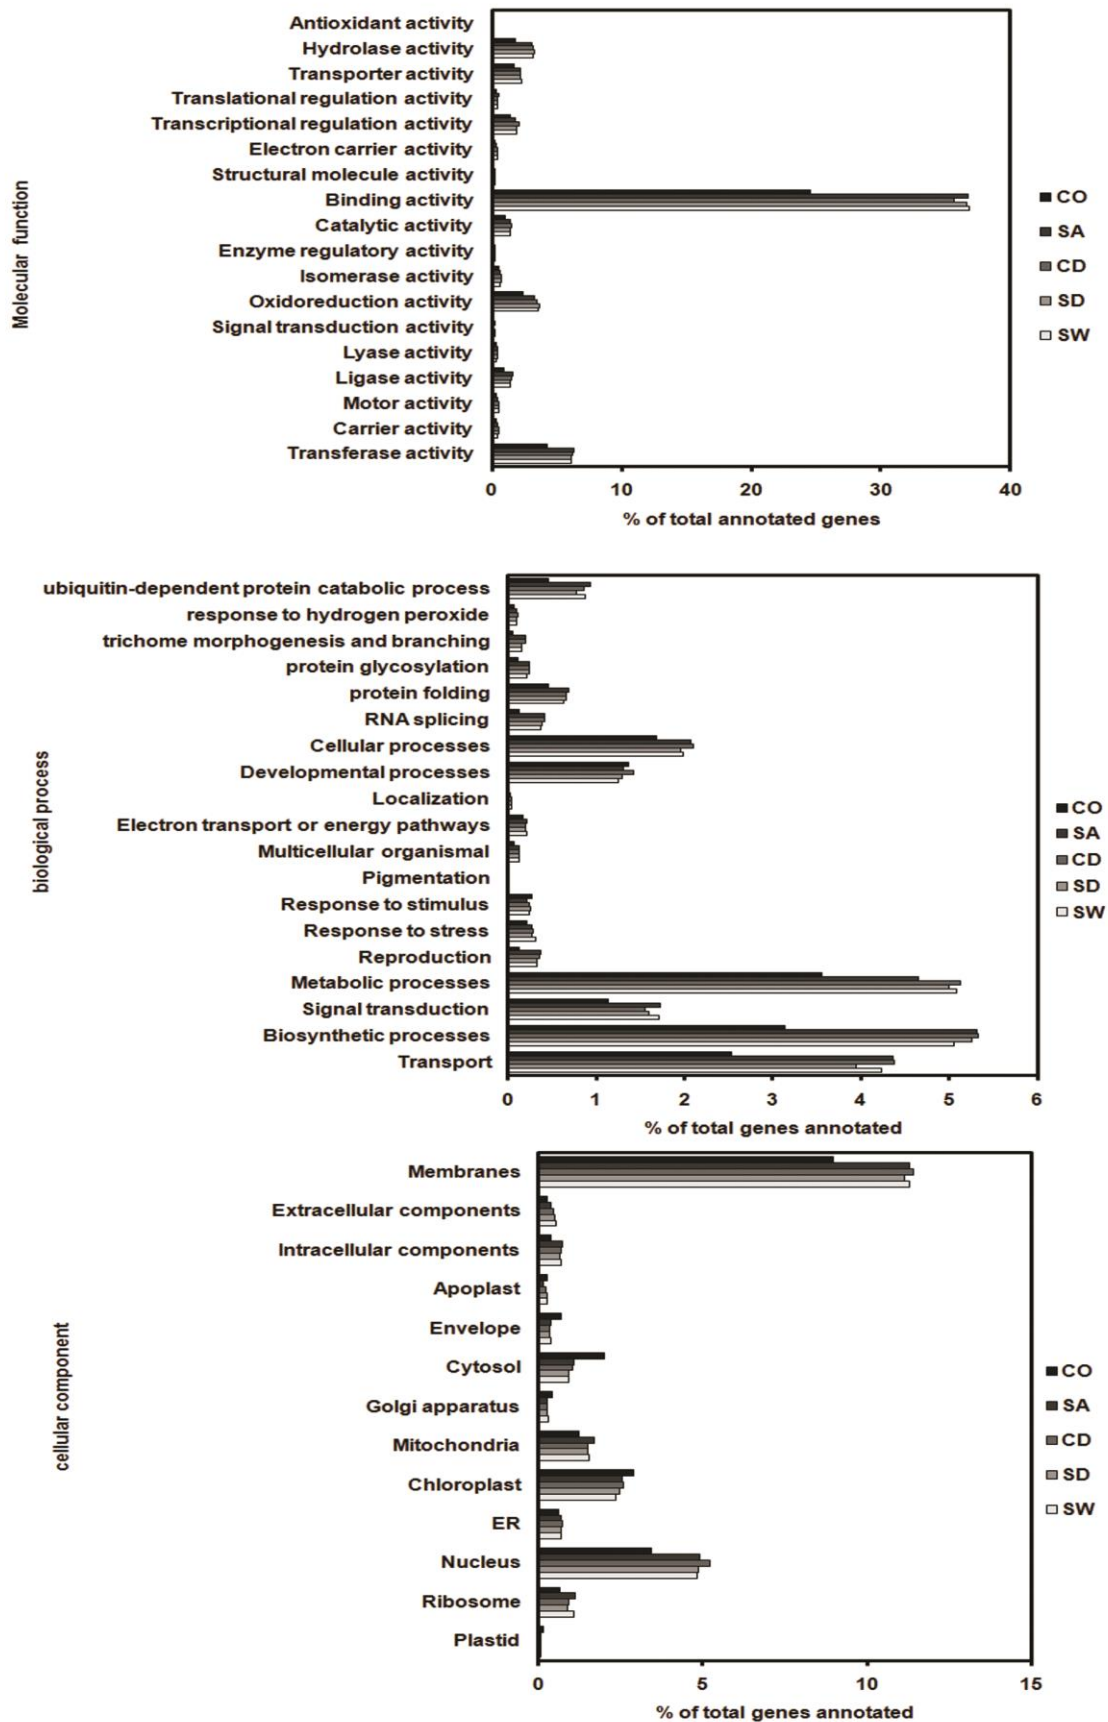

Figure S3. Distribution of *A. annua* CO, SA, CD, SD and SW transcripts across various GO terms.

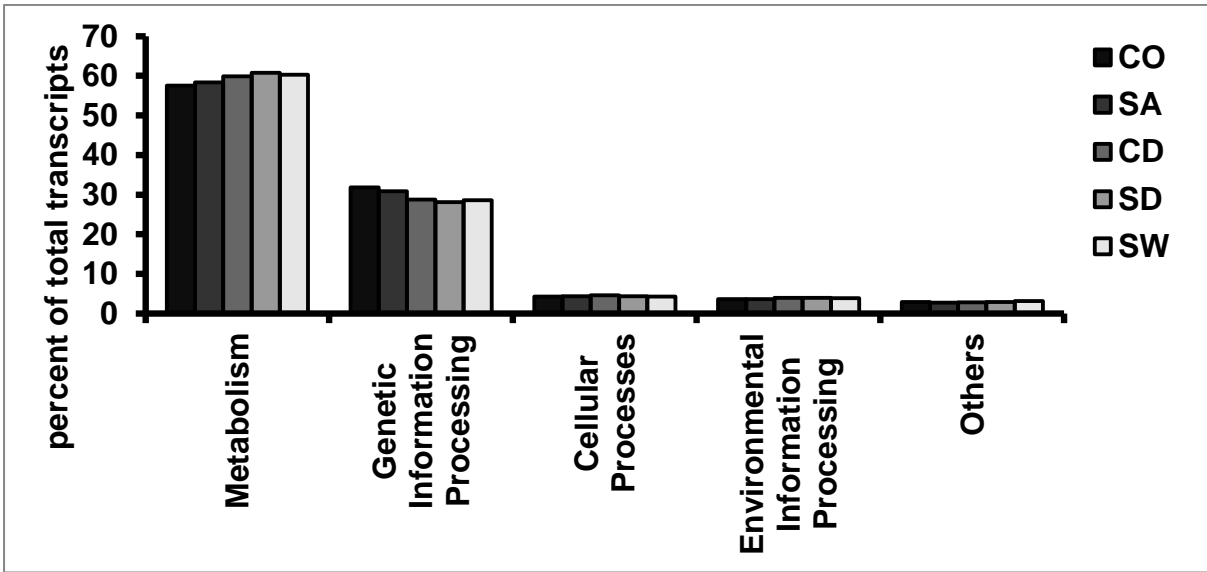

Figure S4. KEGG classification.

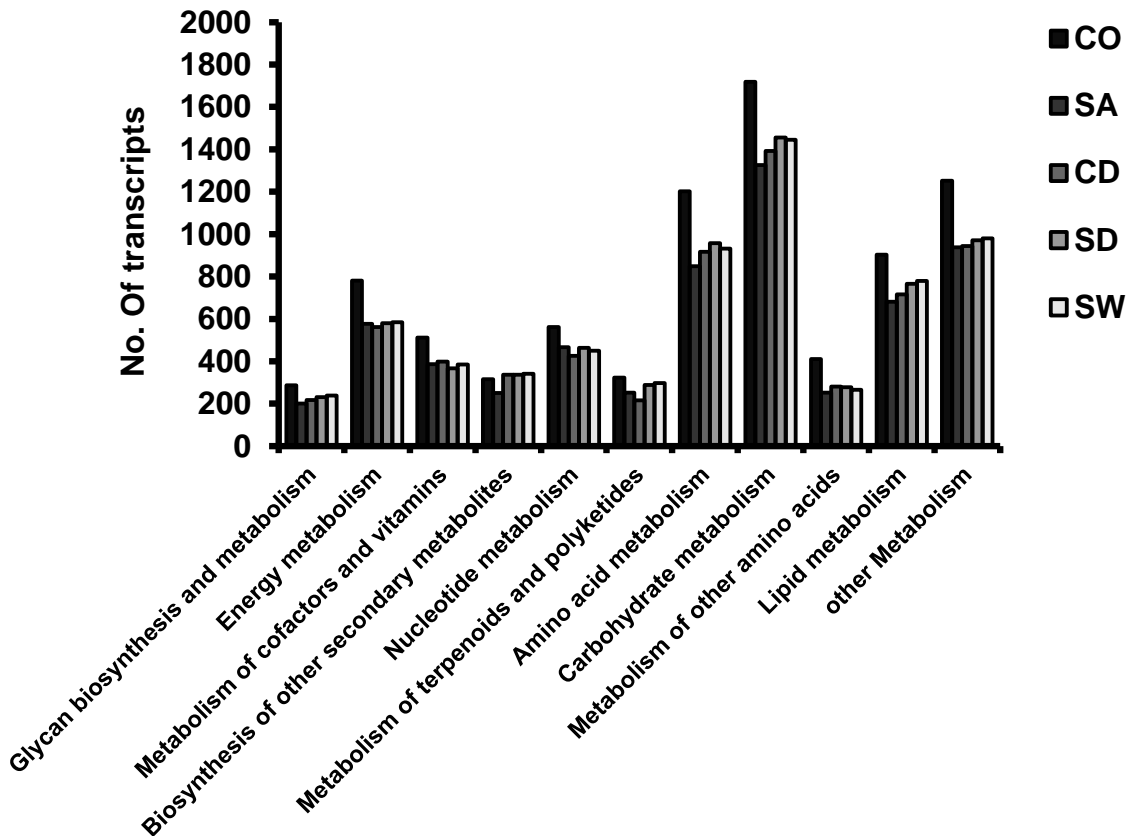

Figure S5. KEGG classification based on metabolism categories. Transcripts of *A. annua* control(CO), salinity(SA), cold(CD), drought(SD) and water-logging(SW) samples assigned to metabolism category were classified to 11 groups based on metabolism categories of KEGG.

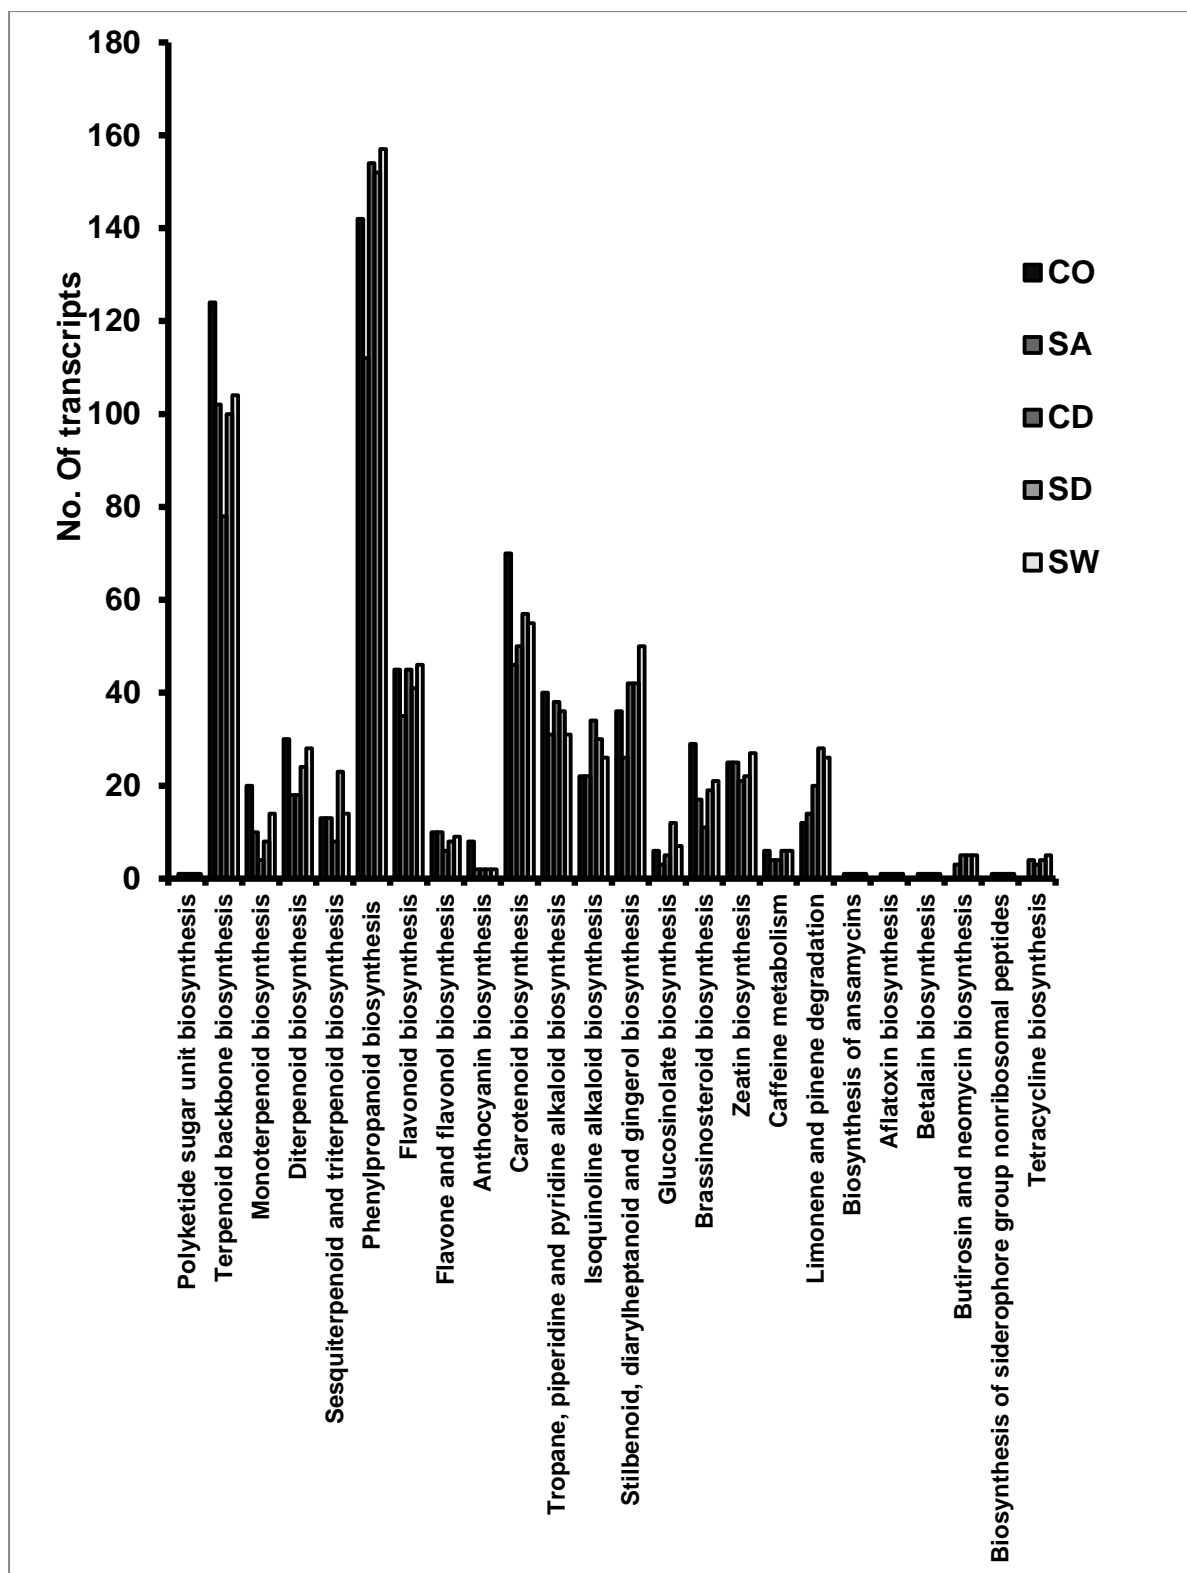

**Figure S6. KEGG classification based on secondary metabolism categories.** Transcripts of *A. annua* control(CO), salinity(SA), cold(CD), drought(SD) and water-logging(SW) samples assigned to secondary metabolism category were classified in 24 groups based on secondary metabolism categories of KEGG.

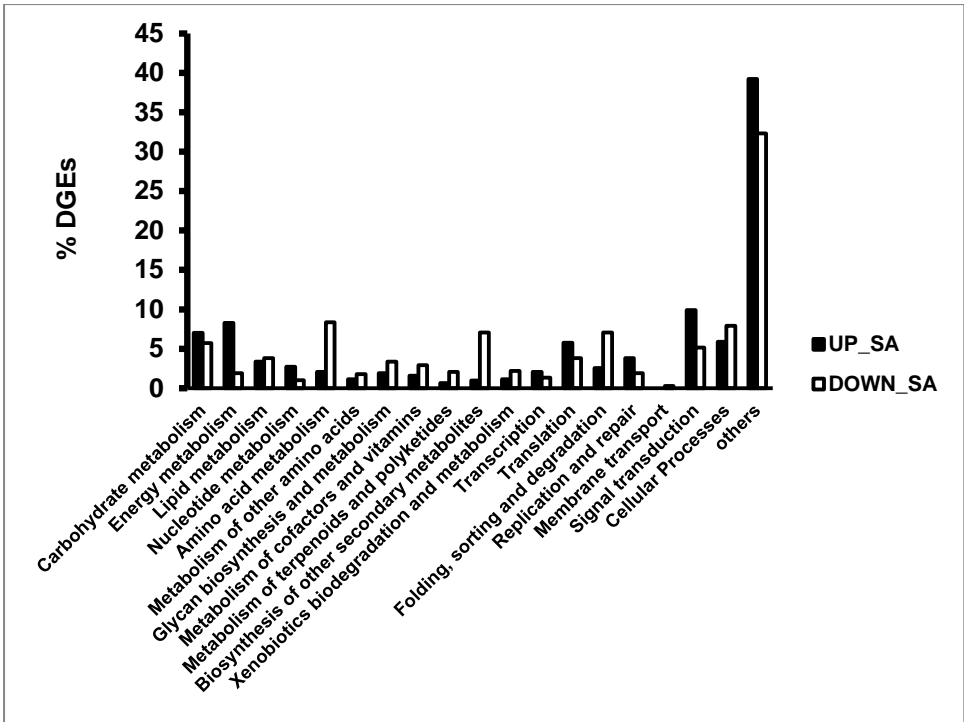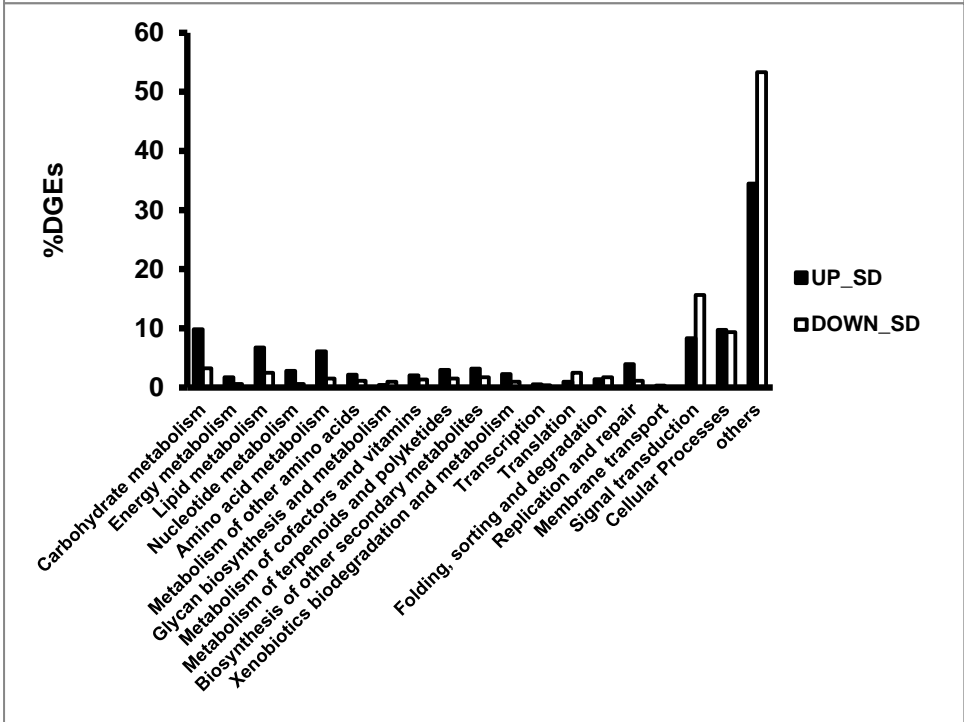

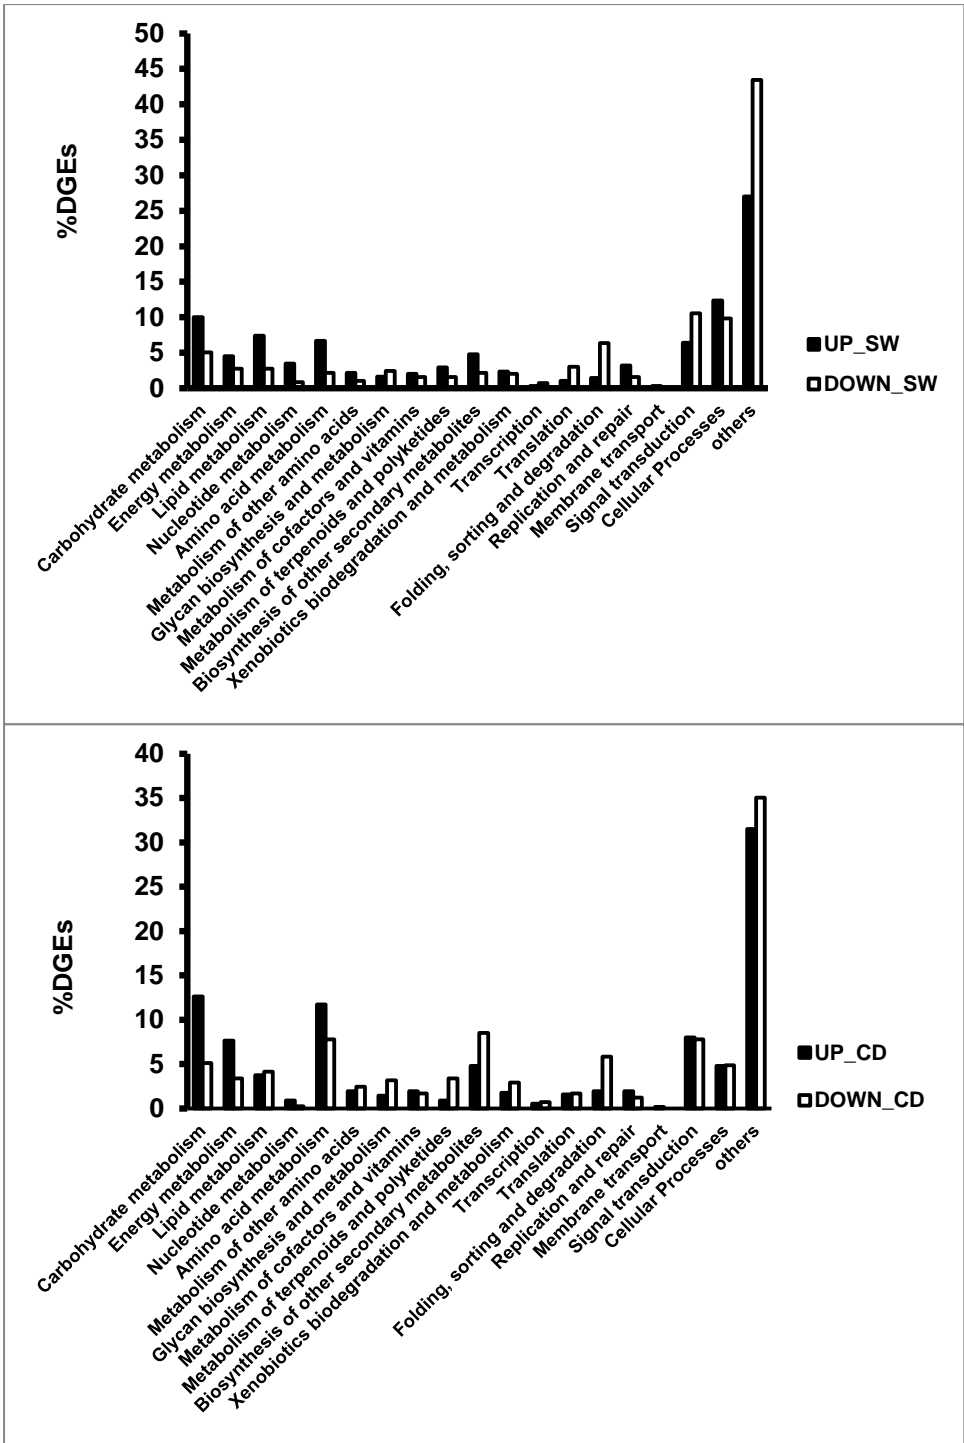

**Figure S7. KEGG classification for significantly differentially expressed genes.** Transcripts of *A. annua* showing significant differential expression ( $\log_2$ fold change  $\geq 1$  and  $p$  value  $\leq 0.05$ ) in different stresses, SA(salinity),CD(cold),SD(drought) and SW(water-logging), were assigned to KEGG categories.

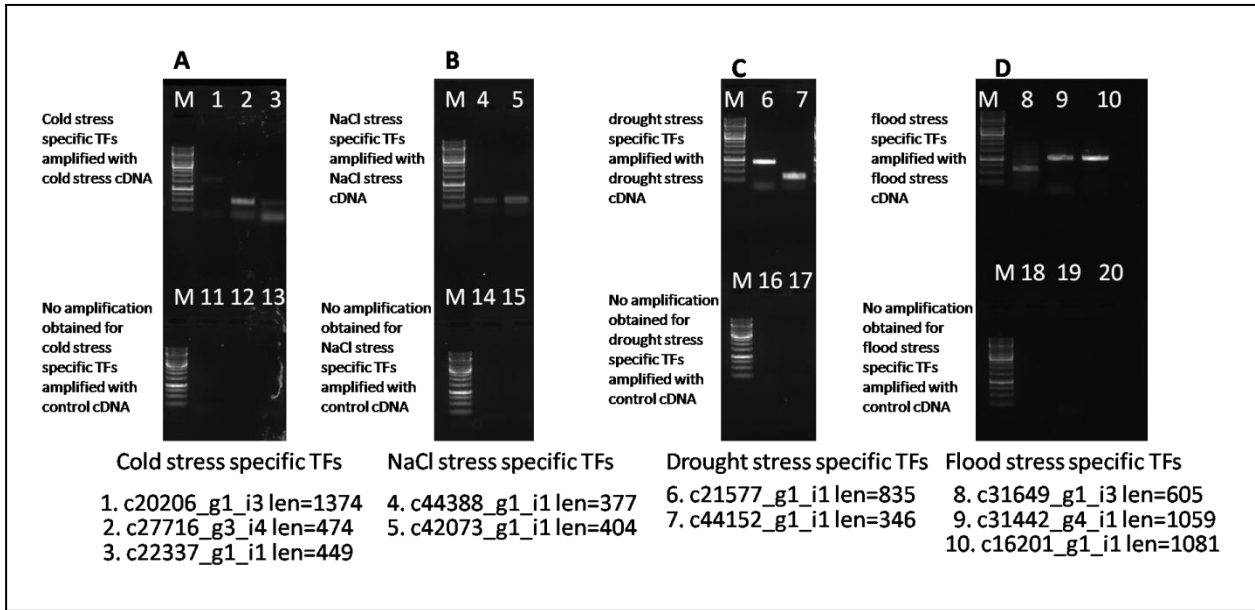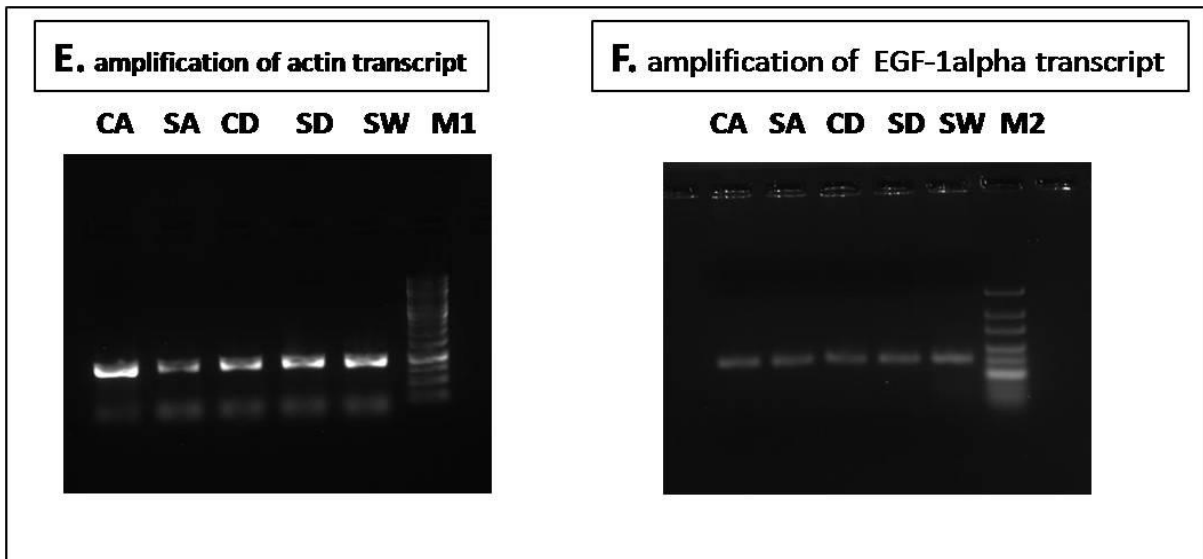

**Figure S8: Amplification of stress specific transcription factors:**

**A 1,2,3:** cold stress specific TFs (transcription factors) (1. c20206\_g1\_i3 length=1374bp, 2. c27716\_g3\_i4 length=474bp, 3. c22337\_g1\_i1 length=449bp ) amplification with cold stress cDNA. **A 11, 12, 13:** no amplification obtained for cold stress specific TFs amplified with control cDNA. **B 4, 5:** NaCl stress specific TFs (4. c44388\_g1\_i1 length=377bp, 5. c42073\_g1\_i1 length=404bp) amplification with NaCl stress cDNA. **B 14, 15:** no amplification obtained for NaCl stress specific TFs amplified with control cDNA. **C 6, 7:** Drought stress specific TFs (6. c21577\_g1\_i1 length=835bp, 7. c44152\_g1\_i1 length=346bp) amplification with drought stress cDNA. **C16, 17:** no amplification obtained for drought stress specific TFs amplified with control cDNA. **D 8, 9, 10:** flood stress specific TFs (8. c31649\_g1\_i3 length=605bp, 9. c31442\_g4\_i1 length=1059bp, 10. c16201\_g1\_i1 length=1081bp) amplification with flood stress cDNA. **D 18, 19, 20:** no amplification obtained for flood stress specific TFs amplified with control cDNA. **M: 1 kb ladder. (Original Agarose gel picture is given below)** **E.** actin transcript (700bp) amplification, **F.** Elongation factor 1 alpha transcript (71bp) amplification. CA:control, SA:salt stress, CD:cold stress, SD: drought stress, SW: water-logging stress, M1: 1kb ladder, M2: ultra low range DNA ladder (Liu et al., 2015).



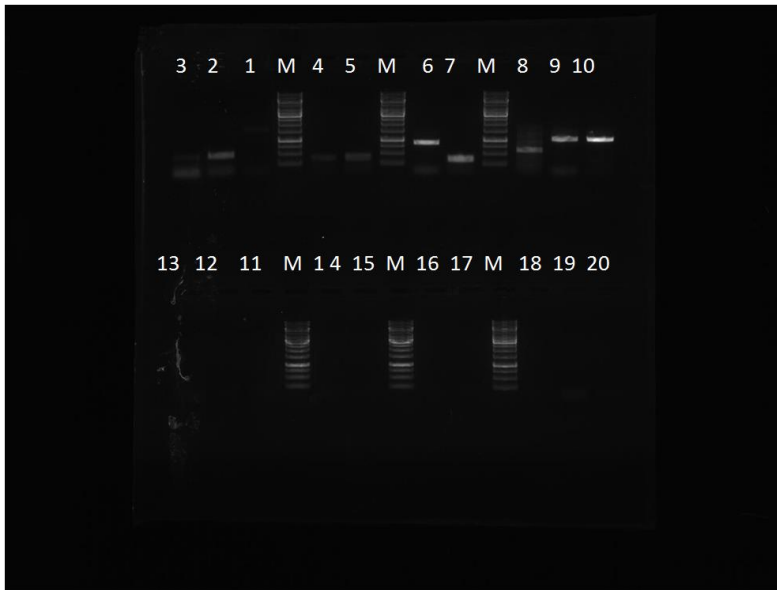

## **Transcritome Data Analysis Plan**

### **Objective of the project:**

- i) De-novo Transcriptome Analysis
- ii) Annotation of assembled transcripts
- iii) Pathway Analysis
- iv) Differential Gene Expression

**Sample name:** CO, CD, SA, SD, SW.

**Sequencing platforms:** Illumina NextSeq500

**Data analysis tools:** FastQC<sup>1</sup>, Trinity<sup>2</sup>, ncbi-BLAST-2.2.29+<sup>3</sup>, CD-HIT<sup>4</sup>, KAAS<sup>5</sup>, DESeq<sup>6</sup>

### **Module1: Raw data processing and QC**

1. The Illumina NextSeq paired end raw reads were quality checked using FastQC<sup>1</sup>.
2. Illumina raw reads were processed by in-house script for adapters and low quality bases trimming towards 3'-end.

### **Module2: De-novo Assembly of Sequenced Transcriptome Data**

De-novo assembly of Illumina NextSeq data was performed using Trinity<sup>2</sup> for default k-mers i.e 25.

### Module 3: Transcripts Annotation

Transcripts were annotated using NCBI BLAST 2.2.29<sup>3</sup> with the proteins of Viridiplantae taken from Uniprot database. For annotation we have considered transcripts having length  $\geq 300$  bp, followed by Clustering of these transcripts with 95% identity using CD-HIT<sup>4</sup> which resulted into COG's.

### Module 4: Pathways Analysis

Pathway Analysis was done by using KAAS<sup>5</sup> Server. Arabidopsis thaliana (thale cress) and Solanum lycopersicum (tomato) were used as reference.

### Workflow of Denovo Transcriptome Analysis

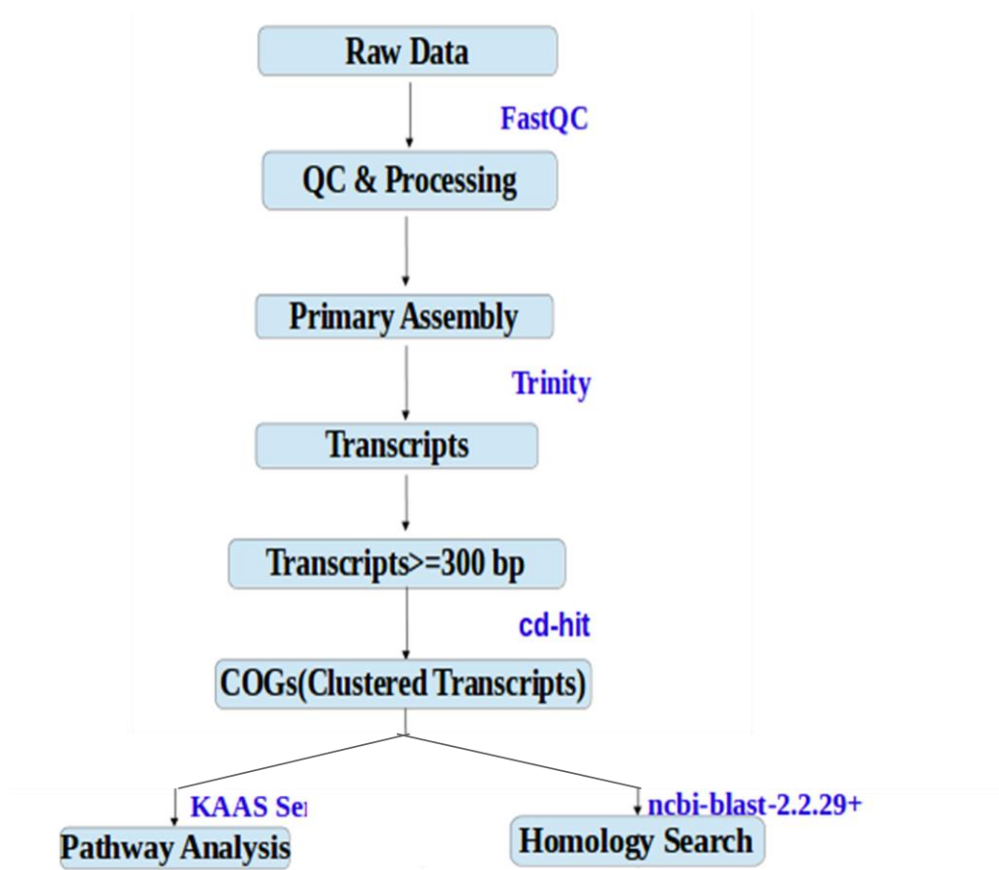

## Module 5 : Differential Gene Expression Analysis

DGE

**Sample name:** CA, CD, SA, SD and SW

**Sequencing platforms:** Illumina NextSeq500

**Data analysis tools:** DESeq<sup>6</sup>

DESeq<sup>6</sup> was used for DGE, process of analysis is explained below:

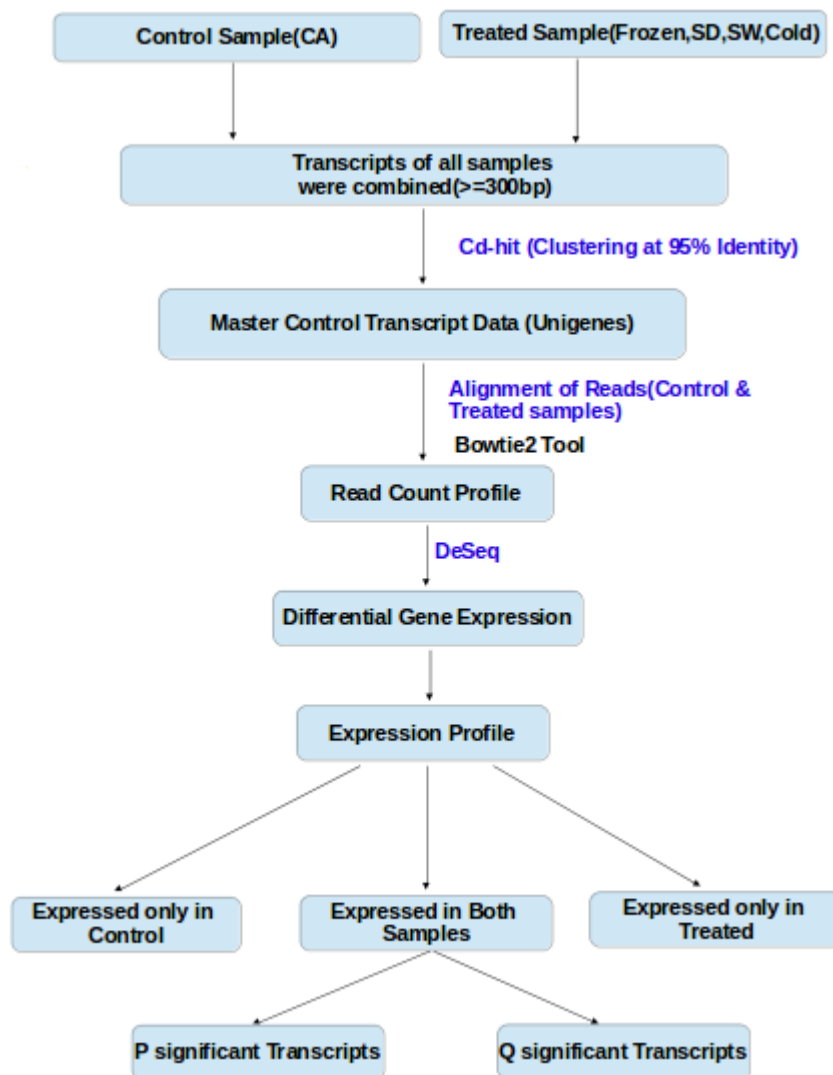

## Analysis Tools Used

1. **FastQC:** <http://www.bioinformatics.org/sample1.babraham.ac.uk/projects/fastqc/>

2. **Trinity:** Tool used for Denovo transcriptome assembly.

**Citations:** Grabherr MG, Haas BJ, Yassour M, Levin JZ, Thompson DA, Amit I, Adiconis X, Fan L, Raychowdhury R, Zeng Q, Chen Z, Mauceli E, Hacohen N, Gnirke A, Rhind N, di Palma F, Birren BW, Nusbaum C, Lindblad-Toh K, Friedman N, Regev A. Full-length transcriptome assembly from RNA-seq data without a reference genome. *Nat Biotechnol.* 2011 May 15;29(7):644-52. doi: 10.1038/nbt.1883. [PubMed PMID: 21572440](#).

3. **ncbi-BLAST-2.2.29+:** Tool used for homology search.

**Citation:** Altschul, S; Gish, W; Miller, W; Myers, E; Lipman, D (October 1990). "Basic local alignment search tool". *Journal of Molecular Biology* 215 (3): 403–410. doi:10.1016/S0022-2836(05)80360-2. PMID 2231712.

4. **CD-HIT:** a fast program for clustering and comparing large sets of protein or nucleotide sequences.

**Citation:** Weizhong Li & Adam Godzik *Bioinformatics*, (2006) 22:1658-9

5. **KAAS:** Web server used for pathway analysis.

**Citation:** Moriya, Y., Itoh, M., Okuda, S., Yoshizawa, A., and Kanehisa, M.; KAAS: an automatic genome annotation and pathway reconstruction server. *Nucleic Acids Res.* 35, W182-W185 (2007)

6. **DeSeq software** (<http://www-huber.embl.de/users/anders/DESeq/>)

**Citation:** Anders, S. & Huber, W. Differential expression analysis for sequence count data. *Genome Biol.* 11(10), R106 (2010).

## Databases used for the Analysis

1. Uniprot database (<http://www.uniprot.org/>)
